# Supplementary material
Source: PubMed Central journal article supplement (PMC10865159)
Supplement: jama-e2327393-s001.pdf [file jama-e2327393-s001.pdf]

# Community Health Azithromycin Trial Burkina Faso

## Manual of Operations and Procedures

Centre de Recherche en Santé de Nouna

The Francis I. Proctor Foundation, University of California, San Francisco

**Catherine Oldenburg, ScD MPH**

**Ali Sié, MD PhD**

**Thomas Lietman, MD**

Mamadou Bountogo, MD

Boubacar Coulibaly, PhD

Cheikh Bagagnan, MS

Guillaume Compaoré, MD

Alphonse Zakane, MS

Mamadou Ouattara, MD

Valentin Boudo

Till Bärnighausen, MD ScD

Thuy D Doan, MD, PhD

Jeremy Keenan, MD MPH

Benjamin Arnold, PhD

Travis Porco, PhD MPH

Kieran O'Brien, MPH

Elodie Lebas, RN

Jessica Brogdon, MPH

Catherine Cook, MPH

Ariana Austin, MS

William Godwin, MPH

Ying Lin, MSPH

Fanice Nyatigo, BS

Huiyu Hu, MS

## Table of Contents

|    |                                                                          |  |           |
|----|--------------------------------------------------------------------------|--|-----------|
| 40 | <b>Table of Contents</b>                                                 |  |           |
| 41 | <b>ABBREVIATIONS</b> .....                                               |  | <b>5</b>  |
| 42 | <b>CHAPTER 1: OVERVIEW</b> .....                                         |  | <b>6</b>  |
| 43 | 1.1. EXECUTIVE SUMMARY .....                                             |  | 6         |
| 44 | 1.2. OBJECTIVES .....                                                    |  | 6         |
| 45 | 1.3. STUDY PARTNERS .....                                                |  | 6         |
| 46 | 1.4. STUDY SITE .....                                                    |  | 7         |
| 47 | <b>CHAPTER 2: CONTEXT</b> .....                                          |  | <b>9</b>  |
| 48 | <b>CHAPTER 3: STUDY DESIGN</b> .....                                     |  | <b>11</b> |
| 49 | 3.1. RANDOMIZATION .....                                                 |  | 11        |
| 50 | <b>CHAPTER 4: STUDY ELIGIBILITY</b> .....                                |  | <b>13</b> |
| 51 | 4.1. ELIGIBLE COMMUNITIES .....                                          |  | 13        |
| 52 | ELIGIBLE INDIVIDUALS .....                                               |  | 14        |
| 53 | 4.2. STUDY SCHEDULE .....                                                |  | 15        |
| 54 | <b>CHAPTER 5: CORE AND NON-CORE STUDY ELEMENTS</b> .....                 |  | <b>16</b> |
| 55 | 5.1. MORTALITY STUDY – ALL COMMUNITIES .....                             |  | 16        |
| 56 | 5.1.1. <i>Core Elements</i> .....                                        |  | 16        |
| 57 | 5.2. MORTALITY PLUS COMMUNITIES .....                                    |  | 18        |
| 58 | 5.2.1. <i>Core Elements</i> .....                                        |  | 18        |
| 59 | 5.2.2. <i>Non-core Study Elements</i> .....                              |  | 19        |
| 60 | 5.3 INDIVIDUALLY RANDOMIZED TARGETED TREATMENT .....                     |  | 19        |
| 61 | <b>CHAPTER 6: CENSUS</b> .....                                           |  | <b>21</b> |
| 62 | 6.1. CENSUS .....                                                        |  | 21        |
| 63 | 6.2. RANDOM CENSUS VERIFICATION .....                                    |  | 24        |
| 64 | 6.3. VERBAL AUTOPSY .....                                                |  | 24        |
| 65 | 6.4. VALIDATING THE MORTALITY OUTCOME .....                              |  | 25        |
| 66 | <b>CHAPTER 7: REGISTERING PARTICIPANTS FOR SPECIMEN COLLECTION</b> ..... |  | <b>26</b> |
| 67 | <b>CHAPTER 8: BLOOD SAMPLES</b> .....                                    |  | <b>26</b> |
| 68 | 8.1. FINGERSTICK .....                                                   |  | 27        |
| 69 | 8.2. DRIED BLOOD SPOTS FOR SEROLOGY .....                                |  | 28        |
| 70 | SET-UP DRYING AREA FOR TROPBIO BLOODSPOTS .....                          |  | 30        |
| 71 | 8.3. HEMOGLOBIN TEST .....                                               |  | 30        |
| 72 | 8.4. THICK AND THIN SMEARS FOR MALARIA .....                             |  | 31        |
| 73 | 8.5. MATERIALS FOR BLOOD COLLECTION .....                                |  | 33        |
| 74 | <b>CHAPTER 9: SPECIMEN COLLECTION FOR RESISTANCE TESTING</b> .....       |  | <b>34</b> |
| 75 | 9.1. POPULATION .....                                                    |  | 34        |
| 76 | 9.2 NASOPHARYNGEAL SWABS .....                                           |  | 34        |
| 77 | 9.2.1 <i>Materials for Swab Collection for Resistance Testing</i> .....  |  | 35        |
| 78 | 9.2.2 <i>Protocol for Tubing and Handling of Samples</i> .....           |  | 35        |
| 79 | 9.3 STOOL SAMPLES .....                                                  |  | 36        |
| 80 | 9.3.1 <i>Stool Specimen Collection</i> .....                             |  | 37        |
| 81 | 9.3.2 <i>Materials for Stool Specimen Collection</i> .....               |  | 38        |
| 82 | 9.3.3 <i>Protocol for Fresh Frozen Stool Collection</i> .....            |  | 39        |

|     |        |                                                                       |           |
|-----|--------|-----------------------------------------------------------------------|-----------|
| 83  | 9.4    | QUALITY CONTROL MEASURES FOR SPECIMEN COLLECTION .....                | 41        |
| 84  |        | <b>CHAPTER 10: TRAINING .....</b>                                     | <b>41</b> |
| 85  | 10.1   | STANDARDIZATION .....                                                 | 41        |
| 86  |        | <b>CHAPTER 11: SAMPLE ORGANIZATION, TRANSPORT, AND STORAGE.....</b>   | <b>41</b> |
| 87  | 11.1   | DE-IDENTIFICATION.....                                                | 42        |
| 88  | 11.2   | SPECIMEN TRANSPORT .....                                              | 42        |
| 89  | 11.3   | SPECIMEN STORAGE.....                                                 | 43        |
| 90  | 11.3.1 | <i>Short-term Sample Storage .....</i>                                | <i>43</i> |
| 91  | 11.3.2 | <i>Long-term Sample Storage.....</i>                                  | <i>43</i> |
| 92  | 11.4   | CATALOG SPECIMENS .....                                               | 43        |
| 93  |        | <b>CHAPTER 12: STUDY MEDICATION .....</b>                             | <b>43</b> |
| 94  | 12.1   | STUDY MEDICATION DESCRIPTION (FROM PFIZER, INC.) .....                | 44        |
| 95  | 12.2   | DOSAGE INFORMATION .....                                              | 44        |
| 96  | 12.3   | MEDICATION PROCUREMENT/DONATION .....                                 | 44        |
| 97  | 12.4   | MEDICATION QUALITY CONTROL.....                                       | 44        |
| 98  | 12.5   | ANTIBIOTIC DISTRIBUTION & MONITORING COVERAGE.....                    | 44        |
| 99  | 12.6   | ADVERSE REACTIONS/SIDE EFFECTS .....                                  | 45        |
| 100 | 12.7   | ADVERSE EVENTS SYSTEMS.....                                           | 46        |
| 101 | 12.7.1 | <i>Passive Adverse Events Monitoring .....</i>                        | <i>46</i> |
| 102 | 12.7.2 | <i>Active Adverse Events Monitoring .....</i>                         | <i>46</i> |
| 103 | 12.7.3 | <i>Adverse Events Data .....</i>                                      | <i>48</i> |
| 104 | 12.8   | SUPPLY ISSUES .....                                                   | 49        |
| 105 |        | <b>CHAPTER 13: PROTECTION OF HUMAN SUBJECTS.....</b>                  | <b>50</b> |
| 106 | 13.1   | INSTITUTIONAL REVIEW BOARD APPROVAL.....                              | 50        |
| 107 | 13.2   | INFORMED CONSENT.....                                                 | 51        |
| 108 | 13.3   | RISKS AND BENEFITS OF STUDY PROCEDURES .....                          | 51        |
| 109 | 13.3.1 | <i>Verbal Autopsy.....</i>                                            | <i>51</i> |
| 110 | 13.3.2 | <i>Swabbing Procedures .....</i>                                      | <i>51</i> |
| 111 | 13.3.3 | <i>Stool Collection .....</i>                                         | <i>51</i> |
| 112 | 13.3.4 | <i>Blood Testing.....</i>                                             | <i>52</i> |
| 113 | 13.3.5 | <i>Anthropometric Measurements .....</i>                              | <i>52</i> |
| 114 |        | <b>CHAPTER 14: STUDY MONITORING .....</b>                             | <b>53</b> |
| 115 |        | <b>CHAPTER 15: DATA AND SAFETY MONITORING COMMITTEE CHARTER .....</b> | <b>53</b> |
| 116 | 15.1   | PRIMARY RESPONSIBILITIES OF THE DSMC.....                             | 53        |
| 117 | 15.2   | DSMC MEMBERSHIP .....                                                 | 54        |
| 118 | 15.3   | CONFLICTS OF INTEREST .....                                           | 54        |
| 119 | 15.4   | TIMING AND PURPOSE OF THE DSMC MEETINGS .....                         | 54        |
| 120 | 15.5   | PROCEDURES TO ENSURE CONFIDENTIALITY AND PROPER COMMUNICATION.....    | 55        |
| 121 | 15.6   | STATISTICAL MONITORING GUIDELINES .....                               | 56        |
| 122 | 15.7   | DSMC CONTACT INFORMATION .....                                        | 57        |
| 123 |        | <b>CHAPTER 16: DATA COLLECTION, MANAGEMENT, AND SECURITY.....</b>     | <b>58</b> |
| 124 | 16.1   | SCOPE OF DATA .....                                                   | 58        |
| 125 | 16.2   | DATA STORAGE, MANAGEMENT, AND SECURITY.....                           | 58        |
| 126 | 16.3   | DATA MONITORING AND CLEANING .....                                    | 59        |

|     |                       |           |
|-----|-----------------------|-----------|
| 127 | <b>APPENDIX .....</b> | <b>60</b> |
| 128 |                       |           |
| 129 |                       |           |

## Abbreviations

|     |                                                 |
|-----|-------------------------------------------------|
| 130 | <b><u>1</u></b>                                 |
| 131 |                                                 |
| 132 | CRSN: Centre de Recherche en Santé de Nouna     |
| 133 | DCC: Data Coordinating Center                   |
| 134 | GPS: global positioning system                  |
| 135 | IRB: Institutional Review Board                 |
| 136 | MUAC: mid-upper arm circumference               |
| 137 | NP swabs: nasopharyngeal swabs                  |
| 138 | PCR: polymerase chain reaction                  |
| 139 | STGG: skim milk tryptone glucose glycerin media |
| 140 | UCSF: University of California San Francisco    |
| 141 | WHO: World Health Organization                  |
| 142 | DHMT: District Health Management Team           |
| 143 |                                                 |

## 144 2 Chapter 1: Overview

145

### 146 1.1. Executive Summary

147 An estimated 7.7 million pre-school aged children die each year, the majority  
148 from infectious diseases.<sup>1</sup> Mass azithromycin distributions for trachoma may  
149 have the unintended benefit of reducing childhood mortality.<sup>1</sup> We recently  
150 demonstrated the biannual mass azithromycin distribution significantly reduces  
151 all-cause child mortality in a cluster randomized trial (MORDOR I) conducted in  
152 three diverse regions of Sub-Saharan Africa.<sup>2</sup>

153

154 Our long-term goal is to more precisely define the role of mass azithromycin  
155 treatments as an intervention for reducing childhood morbidity and mortality.  
156 We propose a cluster randomized trial designed to repeat the original study to  
157 confirm the original results in a different geographic study with similarly high  
158 child mortality, and to better understand the mechanism behind any effect of  
159 azithromycin on child mortality.

160

### 161 1.2. Objectives

162

163 1: Determine the efficacy of biannual mass azithromycin distribution  
164 versus placebo in children aged 1-59 months for reduction in all-cause  
165 mortality. *We hypothesize that biannual distribution of azithromycin will lead to*  
166 *significantly reduced all-cause mortality among children aged 1-59 months after*  
167 *36 months of treatment.*

168

169 2: Determine the efficacy of targeted azithromycin distribution to infants  
170 during an early infant healthcare visit (approximately 5th through 12th  
171 week of life) on infant mortality. *We hypothesize that infants receiving a*  
172 *single dose of azithromycin during early post-neonatal infancy will have*  
173 *significantly lower all-cause mortality compared to infants receiving placebo.*

174

175 3: Determine the mechanism behind the effect of biannual mass  
176 azithromycin distribution for reduction in child mortality.

177

### 178 1.3. Study Partners

179 This study was jointly designed and will be jointly implemented by partners at  
180 CRSN and UCSF. CRSN and UCSF partners contributed equally to the development  
181 of this protocol. Funding for the study is provided by the Bill and Melinda Gates  
182 Foundation.

183 **1.4. Study Site**

184 The study will be conducted in the Nouna District in northwestern Burkina Faso.  
185 It is situated about 300 kilometres north-west of Ouagadougou, the capital of  
186 Burkina Faso.

187 Nouna Health District is one of the six districts of Boucle du Mouhoun Health  
188 Region and covers the geographical area of Kossi Province in the western part of  
189 the country. Nouna is the capital of Kossi province. The health district comprises  
190 of the town of Nouna with a total population of 29,297 inhabitants and a rural  
191 area of about 235,426 inhabitants.

192 The multicultural society consists of 15 ethnic groups whereof the major ones are  
193 the Mossi, Bwaba, Marka, Samo, Gourounsi and Peuhl ethnic groups. The main  
194 socioeconomic activity of the population in the district is farming, similar to the  
195 rest of the country. The only exceptions are the Peuhl who are semi-nomadic  
196 cattle herders and dairy producers.

197 The health infrastructure consists of one District Hospital in Nouna (Centre  
198 Medical avec Antenne chirurgicale, CMA), and over 34 dispensaries (Centre de  
199 Santé et de Promotion Sociale, CSPS). The District Hospital in Nouna covers a  
200 population of 300,360 inhabitants. The Health Centers each cover a total  
201 population between 2,195 and 34,581 inhabitants. Due to deficient road  
202 infrastructure only 69.13% of health facilities are accessible for the DHMT all  
203 over the year with a mean distance of 8.48 kms (Nouna District action plan 2012).

204 Targeted treatment will also be done in the district of K. Vigué in the Haut  
205 Bassins region and in the district of Banfora in the Cascades region..

206  
207

Province de la Kossi  
Carte Administrative et Sanitaire

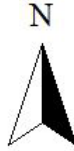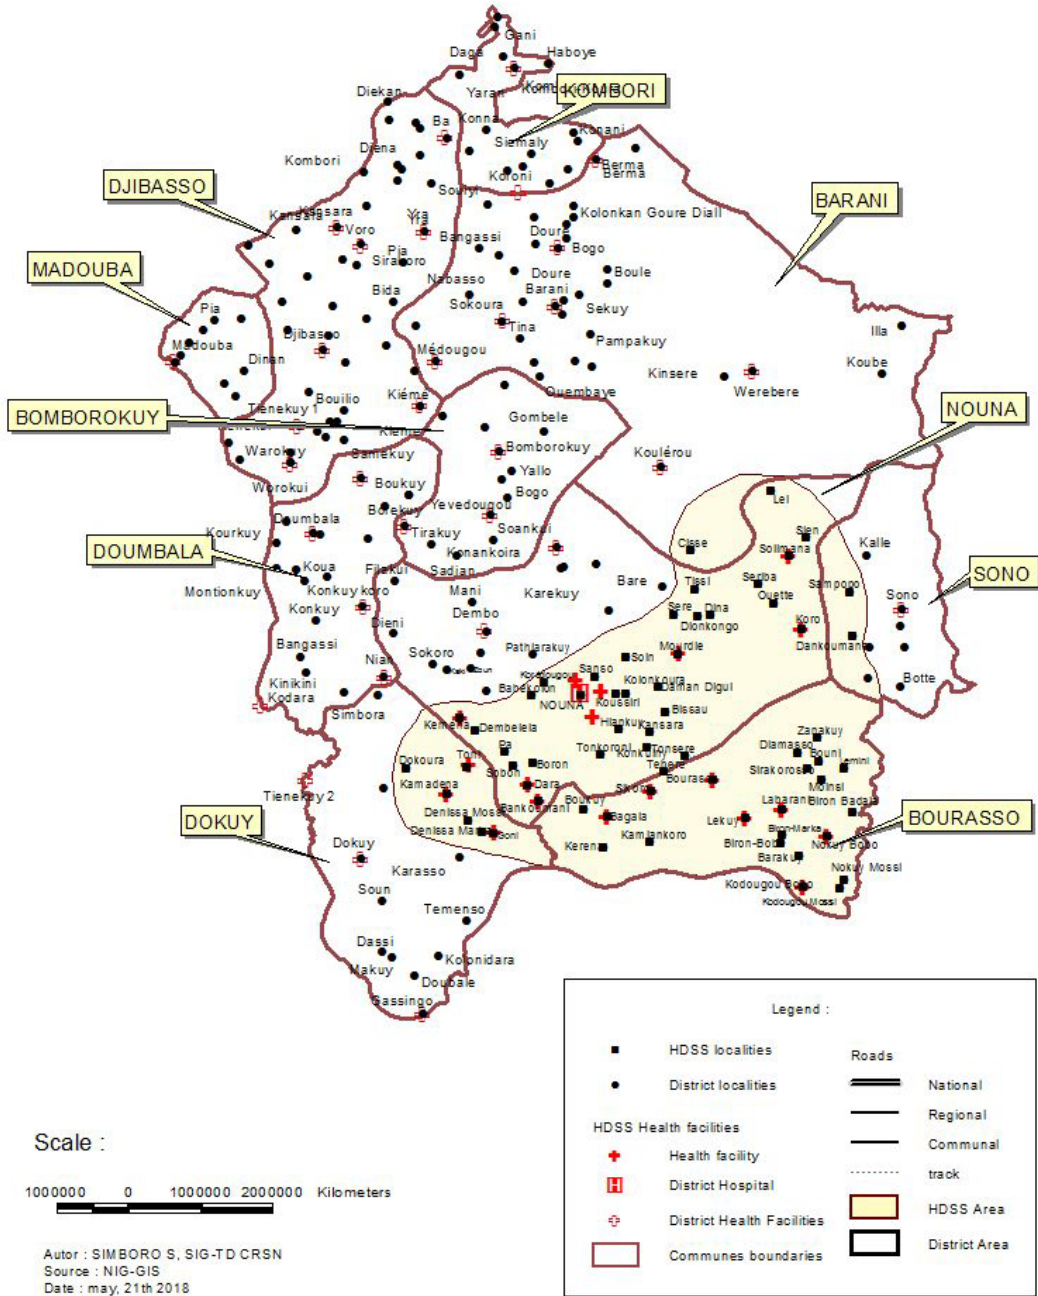

208  
209

210 3



## 211 **4 Chapter 2: Context**

212

213 Although child health and mortality are improving worldwide, children in the  
214 Sahel and sub-Sahel regions of West Africa have the greatest risks of mortality.<sup>4,5</sup>  
215 Burkina Faso's current under-5 mortality rate is estimated 110 per 1,000 live  
216 births<sup>4</sup>. Similar to other countries in the region, the major causes of child  
217 mortality in Burkina Faso are malaria, respiratory tract infection, and diarrhea.  
218 Malnutrition acts as a major underlying contributor to mortality.<sup>6,7</sup> Interventions  
219 that address these underlying causes may be particularly efficacious for reducing  
220 mortality.

221

222 **Younger children are at a higher risk of mortality.** Approximately 2/3<sup>rd</sup> of  
223 under-5 deaths occur during the first year of life.<sup>4</sup> In general, the child mortality  
224 rate decreases as age increases. While some improvement has been observed,  
225 neonatal mortality is declining at a slower rate than post-neonatal childhood  
226 mortality.<sup>4</sup> Many child health interventions are designed specifically for children  
227 over 6 months of age, such as vitamin A supplementation, seasonal malaria  
228 chemoprevention, and lipid-based nutritional supplementation. Identification of  
229 strategies that are safe and effective for the youngest children will be required to  
230 address persistently high rates of neonatal and infant mortality.

231

232 **The MORDOR I study demonstrated a significant reduction in all-cause child**  
233 **mortality following biannual mass azithromycin distribution.** Across three  
234 diverse geographic locations in sub-Saharan Africa (Malawi, Niger, and  
235 Tanzania), biannual mass azithromycin distribution over a two-year period led  
236 to a 14% decrease in all-cause child mortality. In Niger, 1 in 5-6 deaths were  
237 averted. These results are qualitatively similar to those of a previous study of  
238 mass azithromycin distribution for trachoma control in Ethiopia, which found  
239 reduced odds of all-cause mortality in children in communities receiving mass  
240 azithromycin compared to control communities.<sup>1</sup>

241

242 **In MORDOR I, the strongest effect of azithromycin was in the youngest cohort**  
243 **of children.** Across all three countries, the strongest effect of azithromycin was  
244 consistently in children 1-5 months of age, with an approximately 25% reduction  
245 in all-cause mortality. However, MORDOR I was not optimized to target the  
246 youngest age groups. Although children as young as 1 month were eligible,  
247 biannual distributions might not reach some children until 7 months of age. On  
248 average, children were first treated at 4 months. Given that there may be a  
249 substantial benefit to treating children at younger ages, azithromycin strategies

250 that are designed to target younger age groups may be even more beneficial for  
251 reducing child mortality.

252

253 **Here, we propose a randomized controlled trial designed to evaluate the**  
254 **efficacy of mass and targeted azithromycin strategies for child mortality.** In the  
255 rural northwestern district of Nouna in Burkina Faso, we propose to randomize  
256 villages to biannual mass azithromycin distribution or placebo. This study was  
257 designed by CRSN and UCSF partners to confirm the results of MORDOR I,  
258 evaluate an alternative health systems distribution point (targeted treatment) for  
259 delivery of azithromycin to young children, and to provide a platform for  
260 evaluation of potential mechanisms behind the effect of azithromycin by  
261 collecting and processing additional specimens and tests.

## 262 **5 Chapter 3: Study Design**

263

264 The research team will assess childhood mortality over three years, comparing  
265 communities where children aged 1-59 months receive biannual oral  
266 azithromycin and/or targeted azithromycin during the 5<sup>th</sup>-12<sup>th</sup> week of life in  
267 conjunction with the first Expanded Programme on Immunization (EPI) vaccine  
268 visit, the BCG vaccine visit and the 42-day postnatal health visit/well-child visit  
269 or biannual placebo and targeted placebo. All eligible communities in Nouna  
270 District will be randomized (278 communities). A random sample of 48 (24/arm)  
271 communities from within the HDSS will be selected to participate in the  
272 “Mortality Plus” study, which will entail an annual morbidity exam among 15  
273 randomly selected children per community to monitor infectious disease  
274 morbidity, nutritional status, and macrolide resistance. All communities will  
275 contribute to the mortality outcome. All biologic specimens collected as part of  
276 the morbidity and resistance outcomes will be stored and made available to other  
277 investigators for further laboratory testing at the conclusion of the study, per  
278 Gates Foundation guidelines.

279

280

### 281 **3.1. Randomization**

282

283 **Randomization of Treatment Allocation.** All eligible communities in Nouna  
284 District will be randomized in a 1:1 fashion to biannual azithromycin or placebo.  
285 Targeted treatment will be randomized 1:1 individually to azithromycin or  
286 placebo in the nouna, K vigué and banfora districts. Refer to SAP for  
287 randomization details.

288

289 **Study Participants:** At months 0, 12, 24, and 36 a random sample of children will  
290 be selected using a computer-generated simple random sample for exams and  
291 sample collection to monitor for morbidity and resistance in the Mortality Plus  
292 communities.

293  
294  
295  
296

Figure 1: Trial Profile

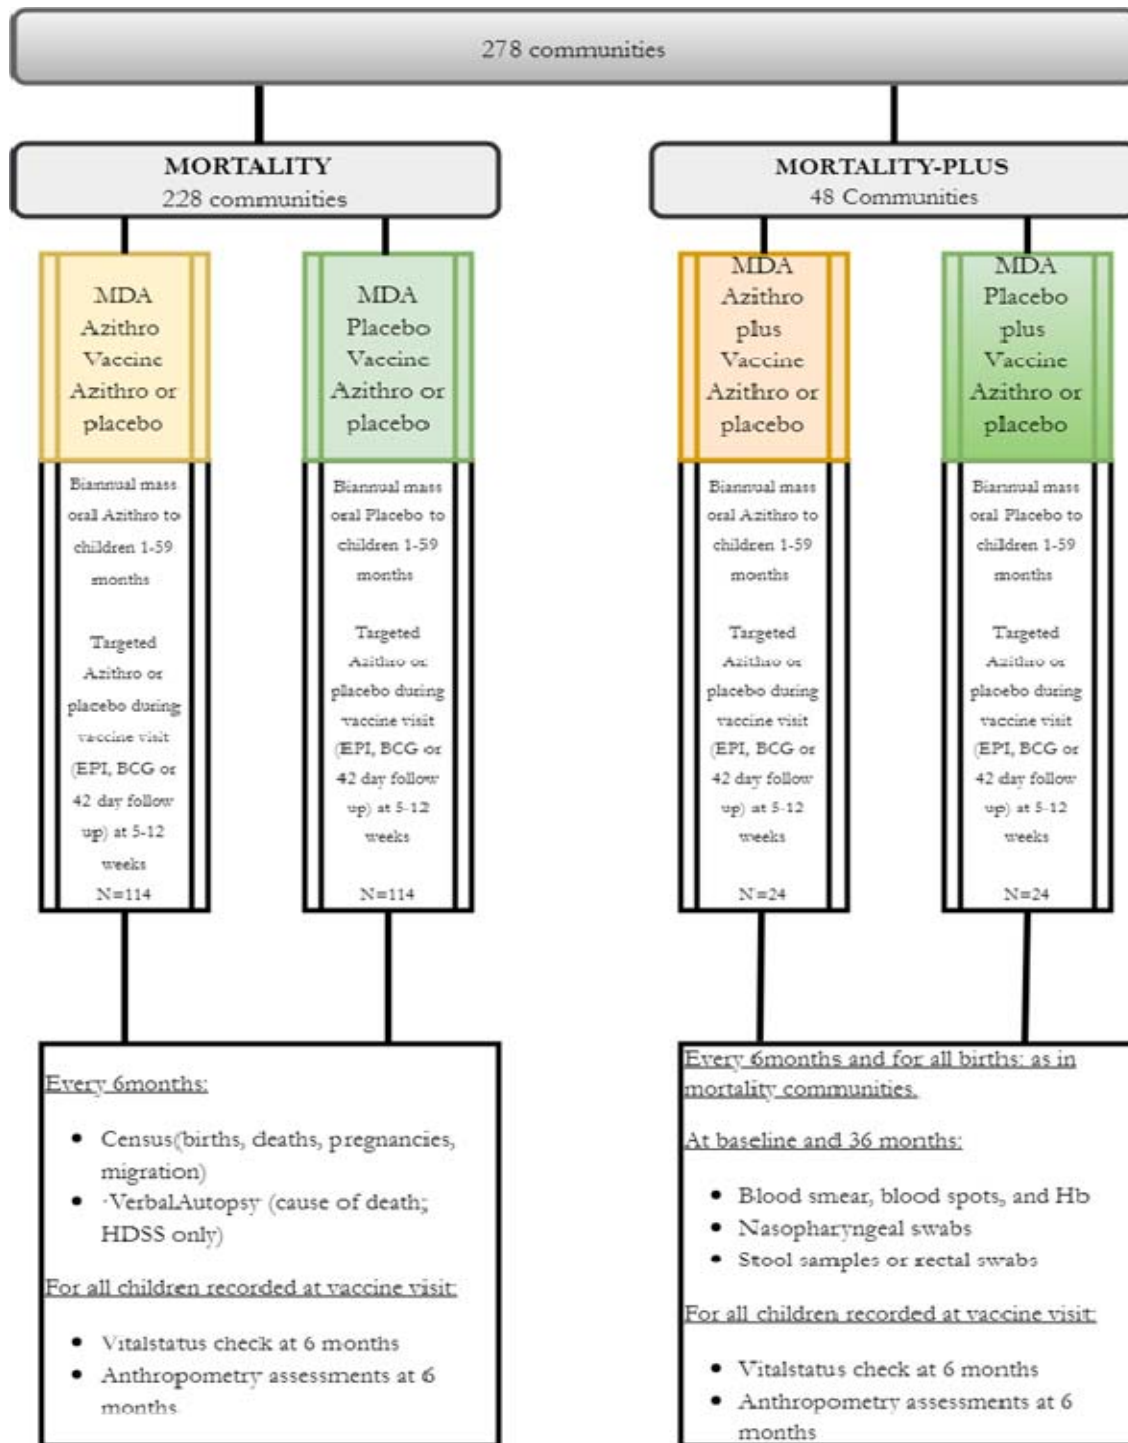

297

298 **6 Chapter 4: Study Eligibility**

299

300 **4.1. Eligible Communities**

301 To be eligible for the trial, a community must meet the following criteria:

302

303

1. The community location in target district.

304

2. The community leader consents to participation in the trial (this does not obviate the need for individual consent, but without overall leadership consent, the community as a whole cannot be part of the trial).

305

306

307

308

3. Eligible communities estimated population no more than 2,000 people.

309

All communities with an estimated population of more than 2000

310

people will be split into 2 or more randomization units

311

4. The community is not in an urban area.

312

313

314 **6.1 Eligible Individuals**

315

316 **Mortality Study:**

317 **Census:** The study can be thought of as consisting of seven 6-month  
318 segments, each of which starts with a census and ends with a follow-up  
319 census. All children in the study communities aged 1-59 months (up to but  
320 not including the 5<sup>th</sup> birthday) at the initial census of each segment are  
321 eligible to participate in the subsequent 6-month segment of the study.  
322 Note that the information for children erroneously entered into the census  
323 (e.g., children younger than 1 month or  $\geq 60$  months) can be corrected at  
324 the subsequent treatment, subsequent census, or at a verbal autopsy later  
325 in the study. However, these changes will not be applied retroactively;  
326 these misclassified children will still be included in the study population  
327 for that 6-month segment and any deaths will be counted toward the  
328 primary outcome. In addition, all children listed on the initial census for  
329 that 6-month segment will be included in the outcome, regardless of  
330 whether they received the study drug.

331

332 **Treatment:** Individuals allergic to macrolides or azalides will not be given  
333 the study antibiotic azithromycin, but will be included in the outcome.  
334 Children weighing less than 3.8 kg will not be given treatment either.

335

336 **Birth Notification:** All births in all study communities will be recorded  
337 over the duration of the study.

338

339 **Mortality Plus Communities:**

340

341 **Census:** The criteria for being included in the census are the same as the  
342 Mortality Study, as described above.

343

344 **Treatment:** The inclusion and exclusion criteria for treatment are the same  
345 as for the Mortality Study, as described above.

346

347 **Examination & Sample Collection:** A random sample of children aged 1-  
348 59 months (up to but not including the 5<sup>th</sup> birthday) are eligible for  
349 examination and sample collection. As described above, the random  
350 sample will be a simple random sample based on the previous census.  
351 These individuals will likewise be selected from the previous census.

352

353

354

355

356

357

358 **4.2. Study Schedule**

359 The schedule for examination and treatment is shown below in Table 1:

360 MORDOR II Study Schedule

|                                                                                                                        | <b>MORTALITY</b>                                                                                                                                                      | <b>MORTALITY PLUS</b>                                                                                                                                            |
|------------------------------------------------------------------------------------------------------------------------|-----------------------------------------------------------------------------------------------------------------------------------------------------------------------|------------------------------------------------------------------------------------------------------------------------------------------------------------------|
| <b>Ongoing</b>                                                                                                         | Birth notification<br>1 <sup>st</sup> EPI or BCG or 42-day postnatal visit/well-child visit azithro or placebo<br>6 mo vital status<br>6 mo Anthropometry assessments | Birth notification<br>1 <sup>st</sup> EPI or BCG or 42-day post natal/well-child visit azithro or placebo<br>6 mo vital status<br>6 mo Anthropometry assessments |
| <b>MORDOR 0<br/>Aug-19 to Jan-19</b>                                                                                   | Census<br>Azithro or placebo                                                                                                                                          | Census<br>Swabs<br>Blood<br>Anthropometry<br>Azithro or placebo                                                                                                  |
| <b>MORDOR 6<br/>Feb-19 to Jul-20</b>                                                                                   | Census<br>Verbal Autopsy<br>Azithro or placebo                                                                                                                        | Census<br>Azithro or placebo                                                                                                                                     |
| <b>MORDOR 12<br/>Aug-20 to Jan-20</b>                                                                                  | Census<br>Verbal Autopsy<br>Azithro or placebo                                                                                                                        | Census<br>Azithro or placebo                                                                                                                                     |
| <b>MORDOR 18<br/>Feb-20 to Jul-21</b>                                                                                  | Census<br>Verbal Autopsy<br>Azithro or placebo                                                                                                                        | Census<br>Azithro or placebo                                                                                                                                     |
| <b>MORDOR 24<br/>Aug-21 to Jan-21</b>                                                                                  | Census<br>Verbal Autopsy<br>Azithro or placebo                                                                                                                        | Census<br>Azithro or placebo                                                                                                                                     |
| <b>MORDOR 30<br/>Feb-21 to Jul-22</b>                                                                                  | Census<br>Verbal Autopsy<br>Azithro or placebo                                                                                                                        | Census<br>Azithro or placebo                                                                                                                                     |
| <b>MORDOR 36<br/>Feb-22 to Jul-22</b>                                                                                  | Census<br>Verbal Autopsy<br>Azithromycin for all<br>Birth History (subset of communities)                                                                             | Census<br>Swabs<br>Blood<br>RDT<br>Anthropometry<br>Swab targeted treatment group                                                                                |
| <b>Note: Only children aged 1 month to 59 months in each community will be treated during mass drug administration</b> |                                                                                                                                                                       |                                                                                                                                                                  |

361

362

363

## 364 **7 Chapter 5: Core and Non-Core Study Elements**

365 An overview of core and non-core elements for the mortality and morbidity study is  
366 provided here, but will be described in more detail in the following chapters.

### 367 **5.1. Mortality Study – All Communities**

368

#### 369 **5.1.1. Core Elements**

370 We will conduct the following study activities for the mortality study:

#### 371 **Training**

372 Standardization activities before each biannual census will consist of didactic  
373 classroom instruction and mock census activities, followed by in-field training.

#### 374 **Pre-census and mapping questionnaire**

375 Before the beginning of the study, we will perform a pre-census to be able to list all  
376 compounds and household in our study area. This pre-census will help us organize  
377 our data census collection by knowing the area we will be working on.

378 The pre-census will include all questions ask during regular census (see chapter  
379 census below) and will include a mapping questionnaire about the characteristics of  
380 each household:

- 381 - Wall, roof and ground of the house
- 382 - Type of water supply
- 383 - Latrization
- 384 - Electricity
- 385 - Telephone (if exist take number with permission)
- 386 - Cooking
- 387 - Education of the head of household and mother/guardian
- 388 - Child individual information:
  - 389 ○ Pre schooling
  - 390 ○ Breastfeeding
  - 391 ○ Use of bednet
  - 392 ○ Handicap

393

#### 394 **Census**

395 An enumerated population census for 0 – 60 month olds (focusing on this age group)  
396 will be conducted every 6 months by trained field workers masked to study arm,  
397 recording births, deaths, and migration of children eligible for treatment. Pregnant



398 women will be noted at each census, to maximize inclusion of newborns on the  
399 subsequent census.

#### 400 **Core Census Elements**

401 The following elements will be considered part of the core HDSS census  
402 activities:

- 403 • Enumeration of the compound
- 404 • Full enumeration of household members with emphasis on children aged  
405 0-60 months (age, sex) in a way that each child could be link to his mother
- 406 • Enumeration of pregnancies
- 407 • Recording of caregiver for each child <60 months
- 408 • Recording head of household
- 409 • Mid-upper arm circumference measurement for all children aged 0-60  
410 months
- 411 • GPS coordinates

412

#### 413 **Random Census Verification**

414 A repeat census will be conducted in a random selection of households at each study  
415 visit. Personnel will be different from the original census. This will allow us to assess  
416 whether the census identified all births, deaths, and migratory episodes relative to  
417 the previous census.

#### 418 **VerbalAutopsy**

419 Verbal autopsy will be conducted in the district according to current methods for  
420 measuring verbal autopsy for all children aged 1-59 months who died during the  
421 study.<sup>3</sup> The interview is conducted with the caregivers or relatives, using the  
422 WHO standard verbal autopsy questionnaire WHO-VA-2016. The interview  
423 usually takes place two months after the event with the person who assisted the  
424 deceased before the death. The data collected will be coded using InterVA 4.  
425

#### 426 **Treatment**

427 Children aged 1-59 months on the current census will be offered weight- or height-  
428 based (<1 year and older children who can't stand will be weighted; ≥1 year will be  
429 measured with a flexible dosing stick), directly observed, oral azithromycin  
430 suspension (or oral placebo) every 6 months for 3 years as performed in trachoma  
431 programs. Specifically, individuals are eligible on or after their one month birthday,  
432 and prior to the day of their fifth birthday.

433 At the final treatment distribution, CHAT 36, all children 1-59 months old will be  
434 given a single dose of azithromycin. Placebo will not be utilized at the final phase.

435 **Antibiotic Coverage Surveillance**

436 We will estimate antibiotic coverage from the most recent biannual census records.  
437 At the end of each treatment round at months 6, 12, 18, 24, and 30 we will identify  
438 any children who have missed 2 or more consecutive treatments, and forward this  
439 information to the census team.

440 **Birth history at the 36 months visit**

441 At the final visit (36 month) we will obtain birth history in a subset of communities.  
442 All women in childbearing age living in selected communities will be asked if they  
443 experienced births in the last 10 years. Name of women, age, name of children and  
444 age or date of birth will be collected. Vital status of each birth will be recorded.

445 **5.2. Mortality Plus Communities**

446

447 **5.2.1. Core Elements**

448

449 All core elements described in 5.1.1 will also be conducted in the Mortality Plus  
450 communities.

451

452 The designation “core elements” means that all study communities will be  
453 performing the study activity.

454

455 In all study sites, we will perform the following tests on a random sample of 15  
456 children aged 1-60 months from each community at baseline, 12, 24, and 36  
457 months:

- 458 - Blood samples (dried blood spots) for malaria and anemia
- 459 - Nasopharyngeal swabs for pneumococcal macrolide resistance
- 460 - Stool samples or rectal swabs to assess for macrolide resistance
- 461 - Anthropometric assessments
- 462 - Rapid diagnostic test for malaria (at 36 months only)

463

464 Samples will be processed at the CRSN laboratory for microbiological culture,  
465 targeted PCR, serologic, thin and thick smears, and ova and parasite tests.

466 Samples for microbiome analyses and specialized tests required by the Gates  
467 Foundation will be shipped to the United States.

468

469 At the final visit (36 months), in the mortality plus communities, we will obtain  
470 one rectal swab from up to 10 children per community who participated in the  
471 targeted treatment distribution.

472

473

474 **5.2.2. Non-core Study Elements**

475 The designation “non-core” element means that not all study communities will  
476 be participating in the activity.

477

478 Mother MUAC assessment

479 In a subset of 20 villages, we will train mothers/guardians on measuring MUAC  
480 on their children weekly. We will train mothers/guardians to bring children to  
481 the nearest CSPS for evaluation if MUAC is <125mm.

482

483 **Passive Surveillance**

484 In each Centre de Santé et de Promotion Sociale (CSPS, community health facility),  
485 we will conduct morbidity passive surveillance. Each CSPS will be equipped with a  
486 tablet for electronic capture of health facility visits. Each visit will be recorded,  
487 including the reason for the visit (e.g., fever, diarrhea, malnutrition, etc), the village of  
488 residence, the person’s age and sex, diagnosis (e.g., malaria, pneumonia, etc),  
489 treatment (e.g., antibiotic, antimalarial, etc), and timing of the visit (e.g., first versus  
490 follow-up visit). Note that this data is already routinely collected on paper forms.  
491 Identifying information like names will not be collected.

492 In each CSPS included in the Mother MUAC assessment, we will collect data on  
493 malnutrition including name of participants in the program, study ID, village of  
494 residence, date of admission in the program, measurements of weight and height,  
495 treatment received and outcome. Notes that this data is already collected on paper  
496 forms

497 Passive surveillance in the district hospitals located in our study area: we will collect  
498 study ID, name of participant, village of residence, date of admission and discharge,  
499 reason for hospitalization, treatment, and outcome of hospitalization for all children  
500 hospitalized under 6 months of age. Notes that this data is already collected on paper  
501 forms

502

503

504 **7.1 5.3 Individually randomized targeted treatment**

505

506 **Recruitment**

507 There are three occasions in which children could be recruited for the targeted  
508 treatment:

- 509 1) During the 1st BCG visit at approximately 5 weeks of life if the child is at  
510 least 29 days old.  
511 2) During the 6 week (42 days) postnatal follow-up visit or any other well-  
512 child visit happening during the age of 5 weeks to 12 weeks  
513 3) When children are attending their first EPI vaccine visit at approximately  
514 12 weeks of life (1st EPI vaccine visit).

## 515 **Enrollment**

516 The children will be enrolled for targeted treatment at the health center or during  
517 other health outreach in the community after obtaining written consent from at least  
518 one guardian. Enrollment will happen at the Nouna district, the K. Vigué district and  
519 Banfora districts

520 The children enrolled have to be living in a participating study community and be  
521 aged 28 days to 12 weeks.

## 522 **Anthropometric Baseline assessments**

523 All children enrolled in the study will undergo anthropometry: we will measure  
524 height, weight and middle arm circumference of each child.

## 525 **Treatment**

526 In all communities, children attending local health posts or children present at  
527 community health outreach will have the opportunity to receive a dose of  
528 azithromycin or placebo. Children will be individually randomized to receive  
529 placebo or azithromycin. Receipt of treatment will be recorded on the child's study  
530 card. This treatment will occur whether the targeted treatment occurs during other  
531 health outreach or when the caregiver seeks vaccination at the health post or when  
532 the child visits the health post for a well-child visit. Community health workers will  
533 conduct a household visit when the mother and child do not come to the health post.

## 534 **2-week infant adverse event survey**

535 To identify any adverse events associated with the individually treated children,  
536 the research team will perform an adverse event survey approximately 2 weeks  
537 after the treatment has been administered in a random subset of children. 10% of  
538 the children treated as part of the study will be randomly selected and the 2-  
539 week IAES will be performed. This survey will be performed by the census  
540 workers masked to treatment arm. A structured questionnaire will be performed  
541 to elicit adverse events following treatment, followed by an open-ended  
542 question. Specifically, we will ask the primary caregiver about the following

543 symptoms during the time since the previous antibiotic distribution: abdominal  
544 pain, vomiting, diarrhea, constipation, hemorrhoids or rash.  
545

### 546 **Six-month Mortality**

547 All children treated in all study communities will be followed for 6 months for vital  
548 status assessment. At approximately 6 months of age, a field worker will assess the  
549 vital status of the child (alive, died, unknown) and their current residence (residing  
550 in the household, moved, unknown). This visit will be an in-person visit to the health  
551 post.

### 552 **Six-month Anthropometry assessment**

553 All children treated during the targeted treatment visit in all study communities will  
554 be followed for anthropometry assessments at approximately 6 months of age. The  
555 child will be measured, weighted and we will measure the middle upper arm  
556 circumference. This procedure will be done at the health post during the 6-month old  
557 vaccine visit.

### 558 **Rectal swab collection**

559 During the 36 months visit in the mortality plus communities we will obtain one  
560 rectal swab from up to 10 children per community who participated in the targeted  
561 treatment.

562

## 563 **8 Chapter 6: Census**

### 564 **6.1. Census**

565

#### 566 **Census Team**

567 Census workers will be selected by the CRSN study coordinator. These  
568 individuals may have different qualifications and educational backgrounds, but,  
569 at a minimum, each census team member should be computer-literate, such that  
570 they are able to operate a tablet computer and type on its keyboard. In addition,  
571 several supervisors will be present for the duration of the census to monitor  
572 census workers.

573

#### 574 **Census Training**

575 Census workers will be trained at the beginning of the study and refresher  
576 trainings will be offered as needed for the duration of the study. Training will  
577 start with reviewing the census data collection software on the tablet computer,

578 care of the tablets, charging of the tablets, etc. The training will then proceed to a  
579 demonstration of the use of the software at a mock household, including  
580 common problems that staff may encounter (e.g., no one at home, GPS function  
581 not working, software crashing). In the final part of the training, the study  
582 coordinators and investigators will accompany team members to several  
583 communities and observe the census activities.

584

### 585 **Census Software**

586 The census will be directly entered into a tablet computer. The software will  
587 capture information about each child aged 0-5 in each household: name, age, sex,  
588 father's name, and mother's name, and will also register any pregnant women.  
589 The GPS coordinates will be documented for each household at the entrance to  
590 the household. At follow-up censuses, team members will identify each  
591 household on the existing census, and will update the status for each child:

- 592 - STATUS: Alive, slept in household last night
  - 593 - STATUS: Alive, but not in household
    - 594 ○ ABSENCE: <1 month
      - 595 ▪ Is he/she coming back within 1 week?
        - 596 • Yes (mop-up)
        - 597 • No
        - 598 • I don't know
      - 599 ▪ INFORMANT: household member, neighbor, village chief,  
600 other
    - 601 ○ ABSENCE: ≥ 1 month
      - 602 ▪ MOVE: Moved within community
        - 603 • INFORMANT: household member, neighbor, village  
604 chief, other
      - 605 ▪ MOVE: Moved outside of community
        - 606 • INFORMANT: household member, neighbor, village  
607 chief, other
  - 608 - STATUS: Died
    - 609 ○ PLACE: Child living in community when died
      - 610 ▪ INFORMANT: household member, neighbor, village chief,  
611 other
    - 612 ○ PLACE: Child had moved out of community when died
      - 613 ▪ INFORMANT: household member, neighbor, village chief,  
614 other
  - 615 - STATUS: Unknown
    - 616 ○ INFORMANT: household member, neighbor, village chief, other
- 617

618 Whenever a new individual is added to the census, the software will  
619 automatically assign each individual to a universal unique identification number  
620 as well as a study identification number.

621

### 622 **Census Data Uploading**

623 The census will be collected on tablet computers with 3G mobile and Wi-Fi  
624 capabilities. There will be 3 options for uploading data to the database. First, and  
625 most desirable, a SIM card with data plan can be purchased for each tablet, and  
626 the data uploaded via cell towers once per day (at the end of the day). This  
627 option is most desirable because it minimizes data loss in the case of a lost,  
628 stolen, or damaged device. In addition, this option will not require each tablet  
629 computer to be in contact with a Wi-Fi hub. As a second option for uploading,  
630 each census supervisor will have access to a Wi-Fi hub, and the supervisor can  
631 visit the census teams to upload data regularly. This option is less desirable,  
632 because the data will be uploaded less frequently. As a third option, the data can  
633 be uploaded at a central study site, either via Wi-Fi or micro USB cable directly  
634 into a computer. This option is least desirable because is not feasible to take the  
635 tablet computers to the central site regularly given the large geographical areas  
636 of the study.

637

### 638 **Census Supervision**

639 The CRSN study coordinator will supervise all census activities. Formal checks  
640 of census quality will be conducted through the random census verification. In  
641 addition, the study coordinator and CRSN GIS team will visualize all censused  
642 households using imagery from GoogleMaps. The goal of this activity will be to  
643 minimize the chances of missing large neighborhoods or specific regions within  
644 study communities. The study coordinator will also check the data entry  
645 progress for each community, paying special attention at the follow-up censuses,  
646 as to whether there are any missing data for the “vital status” variable (i.e.,  
647 present, dead, absent). Once the study coordinator is confident that the entire  
648 community has been reached, and that the amount of missing data are acceptable  
649 (defined as <10% of children in a community), the study coordinator (or other  
650 research team member) will certify the census data collection for that community  
651 complete via Salesforce. Changes can be made to the record at different time  
652 points, but these changes will not be reflected until the subsequent census. All  
653 changes are time and date stamped in the database.

654

### 655 **Census Timing**

656 The census will be performed prior to each mass azithromycin/placebo  
657 distribution. Study sites may choose to perform the census activities over a  
658 discrete time period (e.g., all communities completed over a 1-month period,  
659 requiring census activities to take place simultaneously in many communities at

660 once) or alternatively in a “rolling” fashion (e.g., all communities completed over  
661 a 6-month period, requiring fewer census teams to be active at once). In either  
662 case, each community must be censused every 6 months, so it may not take more  
663 than 6 months to complete all communities. The census must be completed (i.e.,  
664 “locked”) at the household level before treatment can be given.

665

## 666 **6.2. Random Census Verification**

667 A random re-census of households will be conducted at each study visit by  
668 supervisors, additional census team members, or local community monitors, as  
669 appropriate for the study site. Verification will be performed at the household  
670 level, with a minimum of 200 households being resurveyed during the 7 study  
671 visits (approximately 30 per visit). Each team must have at least one household  
672 census verified at each study visit.

673

674 Households will be selected using a different mechanism than the mechanism  
675 used by the original census. The primary method for selecting random  
676 households will be from aerial visualization (Google maps, AfriPop, etc.) If aerial  
677 visualization is not possible in an area, then another method for obtaining  
678 households can be used, such as a random walk.

679

680 Both census teams will use the same electronic template (i.e., no prior records at  
681 MORDOR 0, and the census records from the prior census at each follow-up  
682 visit). We will arbitrarily select a sample of communities stratified by census  
683 team. Once the census has been completed, the trial biostatistician will analyze  
684 the communities for verification.

685

686 The trial biostatistician will compare the results of the original census and the re-  
687 census to identify any discrepancies. The steering committee will determine any  
688 corrective actions once this comparison is made. At the very minimum, the site  
689 study coordinator will inform the original census team of the discrepancies and  
690 will conduct a refresher training session to minimize data collection errors.

691

## 692 **6.3. Verbal Autopsy**

693 Verbal autopsy questionnaires will be completed for all deceased children (aged  
694 1-60 months) in the whole Nouna district.

695

### 696 **Staff**

697 Verbal autopsy interviews will be conducted by trained staff. Training will focus  
698 on conducting sensitive interviews with persons who may still be in mourning;  
699 discussion of verbal autopsy questions; reviewing the format of the paper  
700 and/or electronic questionnaires (including skip logic); and demonstration of the  
701 verbal autopsy technique on 5 mock deaths. The 5 first verbal autopsies will be



702 observed by the study coordinator to ensure that proper procedures are  
703 followed. Each verbal autopsy interviewer will be responsible for a distinct  
704 geographic area, and will be responsible for regular contact with the key  
705 informant from each community.

706

### 707 **Identification of Deaths**

708 Deaths will be identified in 2 ways: from the biannual census, and from the key  
709 informant system. The CRSN data manager will provide a list of all deaths to the  
710 site study coordinator after each census. This list will include information on the  
711 deceased child's name, age, gender, and unique identification number;  
712 community name; and father's and mother's names. The study coordinator will  
713 deliver this list to the appropriate verbal autopsy interviewer. The verbal  
714 autopsy interviewer will also keep a record of all deaths identified by the key  
715 informants. In each case, the key informant will report the community name,  
716 child's name, and parents' names, and the deceased child will be located in the  
717 census database.

718

### 719 **Questionnaire Administration**

720 The questionnaire will be administered as is done routinely for the HDSS.<sup>9</sup> The  
721 HDSS uses the WHO standard verbal autopsy questionnaire WHO-VA-2016 and  
722 cause of death will be assigned using InterVA 4.<sup>10</sup> Questionnaires will be  
723 administered at the home of the deceased child. The informant will be the  
724 deceased child's parent or guardian. If this person is not available, the verbal  
725 autopsy interviewer will try to arrange a time to return to interview this person.  
726 If the parent or guardian is not present on the third visit, they will complete the  
727 questionnaire by interviewing another family member, or as a last resort, a  
728 neighbor. All interviews will be completed in the local language. Our goal is to  
729 perform each verbal autopsy within 1 to 6 months of identification of death. The  
730 child's name and unique identification number will be recorded on the verbal  
731 autopsy record for identification purposes.

732

### 733 **Assigning the Cause of Death**

734 As recommended by the WHO, we will use automated methods to assign causes  
735 of death based on the verbal autopsy questionnaire, rather than physician  
736 review. We will treat all individuals under 4 weeks as one subpopulation, and  
737 individuals 1-60 months as a separate subpopulation for determination of cause-  
738 specific mortality fractions.

739

## 740 **6.4. Validating the mortality outcome**

741

742 No death registries exist at the health facility. All Deaths from our census will be  
743 investigated and will catch false positive deaths recorded during the census.

744 We will record all deaths happening at the health facilities to be able to catch  
745 deaths the field workers might have missed during the census.  
746 The study coordinator will work closely with the health centers to be able to  
747 obtain a list of deaths occurring in his/her facility.

748

749 The Data Manager will be responsible for linking the deaths occurring at the  
750 health facilities with the census file, using the name, age, and village of deceased  
751 children.

752

753 Verbal autopsies will be performed on all deaths picked up by the census and  
754 also all deaths from 0-5 year-olds picked up by the health facility if not included  
755 on our census.

756

### 757 **Chapter 7: Registering Participants for Specimen Collection**

758 Samples will be collected with reference to age, gender, household, and  
759 community, but participant names will not be included in laboratory records to  
760 ensure privacy. Samples will thus not be associated with an individual's name,  
761 but with a random identification number and/or QR code, masking laboratory  
762 personnel and preventing identification of individuals.

763

764 At each time point, each child selected for examination/specimen collection will  
765 be assigned an identification number for database anonymity.

766

767 For each community, the randomized registration list for examinations will be  
768 generated by the database and downloaded to the tablet using the mobile  
769 application.

770

771 After registration, the child and his/her guardian will be directed to the  
772 appropriate examination stations.

773

### 774 **Chapter 8: Blood samples**

#### **Protection of Examiner and Study Participant**

Prior to examinations at the blood station and the swab station, the examiner and tuber must be gloved. The examiner will put latex gloves on both of his/her hands prior to touching the participant and a new pair of gloves will be used for each participant in order to avoid transmitting infection between participants. Purell® Instant Hand Sanitizer will be available for hand sanitization when needed.

775 We will collect:

- 776 1) Thick and thin smears, assessed for malaria parasitemia and  
777 gametocytemia by CRSN microbiologists,  
778 2) Microcuvettes, analyzed for hemoglobin in the field using a HemoCue  
779 analyzer (HemoCue AB, Ängelholm, Sweden), and  
780 3) Dried blood spots, collected on FTA Elute cards (Whatman, Kent, UK; or  
781 appropriate substitution) and sent for laboratory testing for malaria using  
782 a nested PCR assay<sup>40</sup> and/or TropBio cards (TropBio Pty Ltd, QLD,  
783 Australia) for serologic testing.  
784

785 The order of events at the blood collection station is: 1) finger prick; 2) blood  
786 spots on filter paper; 3) hemoglobin test; 4) thin and thick smears for malaria.  
787  
788

**It is important to handle all blood specimens with care  
to minimize risk of infection**

**Wear gloves.** New gloves must be worn for each child.

**Clean spills.** In the event of a blood spill or splash, clean immediately with approved disinfectant (10% bleach or chlorhexidine solution) and wipe with absorbent material.

**Disposal of sharps.** All lancets must be disposed of properly in sharps containers.

**No food.** Food and drink are not allowed at the blood collection station.

789  
790  
791  
792  
793  
794  
795  
796

### 8.1. Fingerstick

Inform the mother that her child's finger will be pricked to obtain blood to test for malaria and anemia. Describe the finger prick procedure, reassure her, and answer all questions. The blood specimen should be collected as described below to minimize the discomfort of the child and to ensure sufficient blood volume collection.

797 A finger stick of capillary blood will be collected for thin and thick blood smears  
798 to assess for malaria, hemoglobin testing, and dried blood spots to be stored for  
799 later testing. Blood will be collected by a gloved health worker using aseptic  
800 technique. Gloves will be changed between each participant. The fingerprick or  
801 heelstick site will be disinfected using a 70% isopropyl alcohol swab.

#### 802 **Fingerstick procedure:**

- 804 1. Prepare the disposable lancet. Use a NEW disposable lancet for each child.  
805 **Do not** re-use lancets!

- 806 2. The recorder will scan the child’s QR code, and place a random number  
807 sticker on the TropBio filter paper and the (right edge of the) slide.  
808 3. Position the child for the finger stick. Make sure that the child’s right hand  
809 is warm and relaxed. Hold the child’s thumb, middle, or ring finger on  
810 his/her right hand (from the top of the knuckle to the tip of the finger)  
811 between your left thumb and finger and disinfect in small outward circles  
812 with an individually packaged alcohol wipe.  
813 4. After the alcohol dries, use the thumb to lightly press the child’s thumb or  
814 finger from the top of the knuckle towards the fingertip to stimulate blood  
815 flow towards the sampling point (puncture site). For the best blood flow  
816 and least pain, prick the side of the thumb/fingertip, not the center. While  
817 applying light pressure towards the thumb/fingertip, hold the lancing  
818 device in your hand and prick the thumb/finger. If the finger prick is  
819 performed properly, a single prick should be sufficient to collect the  
820 required amount of blood.  
821 5. Allow the blood to ooze out. Wipe away the first 2 or 3 drops of blood  
822 with gauze. If necessary, re-apply light to moderate pressure towards the  
823 thumb/fingertip (approximately 1 cm behind the site of the finger prick)  
824 until another drop of blood appears.  
825 *Note: Do not* squeeze forcefully. Avoid “milking” as it may dilute the  
826 blood with tissue plasma.

## 8.2. Dried Blood Spots for Serology

### Collecting the FTA Elute filter paper sample:

- 830  
831 1. Label the filter paper with a random number sticker.  
832 2. Place 2-4 large drops of blood directly from the thumb or finger onto the  
833 large circle on the filter paper (if it is difficult to obtain 4 drops of blood, it  
834 is sufficient to collect 2 drops of blood).  
835 3. Leave the filter paper to air dry for a few minutes, then place the sample  
836 into a small plastic bag along with a desiccant packet.  
837 4. Leave the bag open for a few minutes more, and when the blood is  
838 **completely** dry, roll down the top of the bag and close with a piece of  
839 masking tape.  
840 5. Store the filter paper samples (in small plastic bags) in a larger Ziploc bag.  
841 Keep all filter paper samples in a safe, dry place at room temperature.  
842 6. Blood spots will be stored at room temperature in a locked cabinet in the  
843 study coordinators’ office.  
844  
845

846 **Collecting the TropBio filter paper sample:**

- 847 1. Label the filter paper with a random number sticker.
- 848 2. Grip the filter paper on the side without small circles. Place a droplet
- 849 of blood directly from the thumb or finger onto five of the six circles,
- 850 leaving the right one blank. Be sure to fill each circle completely.

851

852

853

854

855

856

857

858

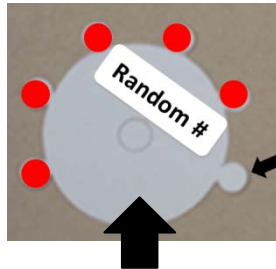

Leave last circle blank

Area to hold the filter paper.  
**Do not touch the small circles.**

861

862

863

864

865

866

867

868

869

870

871

872

873

3. The recorder will scan the QR code.
4. Carefully slide the filter paper onto a pencil to air dry for at least an hour. There should be about 1 cm in between each sample. Secure the pencil into a Styrofoam surface in a box or container to protect from dust.
5. When the filter paper is dry, place each sample into a small zip plastic bag (individually). Place the small bags into a larger Ziploc bag with five desiccant packets.
6. Ensure the large Ziploc bag is sealed tightly, as moisture will damage the samples. Transport these filter paper samples to a freezer.

874

### 875 8.1 Set-up drying area for TropBio bloodspots

876 *Supplies:* pencils, Styrofoam, cardboard box, paper

877 - Place Styrofoam in cardboard box

878 - Put pencils in box/container – space apart

879 - *Note:* When placing the blood spot samples on

880 the pencil, space apart by ~2.5cm with pieces of

881 paper in between each sample.

882

883

884

885

886

### 887 8.3. Hemoglobin Test

888 A portable spectrophotometer (HemoCue, Anglom, Sweden) will be used for

889 hemoglobin testing.

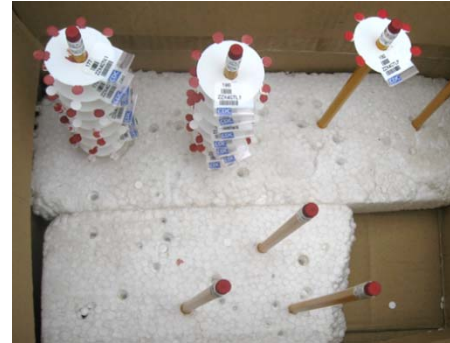

#### Set up HemoCue Analyzer

- 1) Remove the HemoCue analyzer from the case. If a small battery symbol appears on the top right side of the display, the batteries are low. The HemoCue will still give accurate results, but it is strongly recommended to replace the batteries as soon as possible.
- 2) Pull the cuvette holder out to the loading position. Press and hold the left button until the display is activated (ALL symbols appear on display). The display will show the version number of the program, an hour-glass symbol and "Hb." At this time, it will perform an automatic SELFTEST to verify the performance of the device. After 10 seconds, the display will show three flashing dashes and the HemoCue symbol. This means that the HemoCue has passed the SELFTEST and is ready for use. If the SELFTEST fails, an error code will be displayed.

### 890 Collecting a blood sample for hemoglobin (HemoCue):

- 891 1. Remove a cuvette from the container. Reseal the container immediately.  
892 (The recorder can help the examiner with this.)
- 893 2. When the blood drop is large enough, fill the microcuvette in one  
894 continuous process. **Do not refill!** If there is not enough blood to fill the  
895 microcuvette, you must start again with a new microcuvette. Wipe any  
896 excess blood from the sides of the microcuvette with clean gauze or a  
897 paper towel, but be careful to avoid touching the open end of the  
898 microcuvette so blood is not removed.
- 899 3. Look for any air bubbles in the filled microcuvette. If air bubbles are  
900 present, discard the microcuvette and obtain a new drop of blood using a

- 901 new microcuvette. (Small bubbles around the edge of the microcuvette  
902 can be ignored.)
- 903 4. Place the filled microcuvette in the cuvette holder. Gently slide the cuvette  
904 holder to the measuring position to be analyzed immediately. (This **must**  
905 be performed within 10 minutes after filling the microcuvette.)
- 906 5. After 15 – 60 seconds, the hemoglobin value will be displayed. The  
907 examiner should read the hemoglobin value aloud so the recorder can  
908 enter it into the tablet computer. The value will remain on display as long  
909 as the cuvette holder is in the measuring position. The analyzer will turn  
910 off automatically after 5 minutes.
- 911 *Note:* For children 6 months to 5 years, if the hemoglobin is <11.0 g/dL,  
912 the child is anemic. For children 5 – 11 years, if the hemoglobin is <11.5  
913 g/dL, the child is anemic (WHO/UNICEF/UNU, 1997). If a child is found  
914 to be severely anemic, the examiner must refer him/her to the nearest  
915 health center for treatment.
- 916 6. Carefully dispose of the used microcuvette in the sharps container.
- 917 7. **At the end of the day:** Turn off the HemoCue analyzer. Press and hold the  
918 left button until the display reads OFF. The display should be blank.

#### Cleaning the HemoCue Analyzer

- 1) To clean, pull the cuvette holder to the loading position.
- 2) Carefully press the small catch (upper right corner of the cuvette holder). Continue to press the catch and carefully rotate the cuvette holder as far left as possible, and then carefully pull the cuvette holder out of the analyzer.
- 3) Clean the cuvette holder with alcohol or a mild detergent. Push a clean cotton tipped swab moistened with alcohol (without additive) into the opening of the cuvette holder and move from side to side 5 – 10 times. If the swab is dirty, repeat with a new clean swab until the cuvette holder is clean. A dirty cuvette holder may cause the HemoCue analyzer to display an error code.
- 4) After 15 minutes (or less time, depending on the climate), you may replace the cuvette holder and use the analyzer. The cuvette holder must be completely dry before you replace it.
- 5) Put the Hemocue analyzer back into its case.

919 **8.4. Thick and Thin Smears for Malaria**

- 920 1. Label the slide with a random number sticker.
- 921 2. For the thick blood smear:
- 922 a. Place a drop of blood in the center (1 cm from the edge of the slide)
- 923 of a clean, dust-free, and grease-free slide.

- 924                   b. Spread the drop of blood evenly with a disposable wooden  
925                   applicator or with another clean slide into a circle with a diameter  
926                   of 1 cm.
- 927                   c. The blood smear should be about 1cm away from the edge of the  
928                   slide. The correct thickness of a thick blood smear is one through  
929                   which newsprint is barely visible when the blood is still wet.
- 930           3. For the thin blood smear:
- 931                   a. Place a smaller drop of blood on the slide.
- 932                   b. Using another slide angled at 45°, create a feathered edge before  
933                   reaching the other end of the slide.
- 934           4. Allow the blood smears to air dry flat. Do not heat the slides, as this will  
935           damage the parasites. Be sure to protect the slide from dust and insects.  
936           Do not refrigerate slides, as this may cause the smears to detach from the  
937           slide during the staining procedure.
- 938           5. When dry, place the thick and thin blood smears into the slide box.
- 939           6. Smears will be transported at room temperature each day to a diagnostic  
940           facility near the study area.
- 941           7. Within 24 hours of thick and thin blood smear collection, the smears will  
942           be stained with 2% Giemsa stain for 30 minutes. (The thin smear will be  
943           fixed by submerging it in 100% methanol for 30 seconds and then let it air  
944           dry for 1-2 minutes prior to the Giemsa stain.)
- 945           8. Parasite density will be measured by a masked reader using a microscope  
946           at the diagnostic facility.

947  
948 Smears will be stored at room temperature.

949  
950 A rapid diagnostic test (RDT) could be substituted for thick smears if approved  
951 by the Steering Committee.

#### 952 953 **8.4 Rapid Diagnostic Test**

954 A rapid diagnostic test for malaria will be conducted at the final exams (CHAT 36).

955 Blood will be obtained from the finger prick site of the previous exams. A pipette will  
956 be filled with blood which will then be placed into the corresponding chamber on the  
957 test.

958 Three to 6 drops of the buffer solution will be placed into the chamber provided on  
959 the test.

960 The examiner will wait 15 minutes before reading the test.

961 Negative: A single red line appears under the letter “C” on the test. This is the  
962 control.



963 Positive: 2 red lines appear. One line under “C” on the test and a second line under  
964 “P.f” indicating *P. falciparum*.

965 If the result is positive, the child will be referred to the health center for treatment.

966

## 967 **8.5. Materials for Blood Collection**

968

### 969 **Fingerprick**

970 Gloves

971 Disposable lancets

972 Alcohol wipes

973 Cotton balls

974 Gauze

975 10% household bleach or 4% chlorhexidine solution to clean spills

976 Absorbent material for spills

977 Sharps container

978

### 979 **Dried Blood Spots**

980 FTA Elute cards

981 Small zip plastic bags

982 Desiccant packs

983 Masking tape

984 Large Ziploc bags (handful)

985 TropBio circular cards

986 Small zip plastic bags

987 Desiccant packs

988 Large Ziploc bags (handful)

989 Materials for drying apparatus: 12 sharpened pencils, Styrofoam, empty  
990 cardboard box

991

### 992 **Hemoglobin Test**

993 HemoCue machine

994 Extra set of AA batteries

995 Cuvettes

996 Q-tips (handful)

997

### 998 **Thick and Thin Blood Smears**

999 Glass slides

1000 Slide box

1001

1002 Rolls of random number stickers

1003  
1004  
1005  
1006  
1007  
1008  
1009  
  
1010  
1011  
1012  
1013  
1014  
1015  
1016  
1017  
1018  
1019  
1020  
1021  
1022  
1023  
1024  
1025  
1026  
1027  
1028  
1029  
1030  
1031  
1032  
1033  
1034  
1035  
1036  
1037  
1038  
1039  
1040  
1041  
1042  
1043

**Rapid Diagnostic Test**

RDT  
Solution

**Google Nexus 7**

External battery pack

**9 Chapter 9: Specimen Collection for Resistance Testing**

**9.1. Population**

We will collect nasopharyngeal and stool samples on a random set of 15 children aged 1-60 months from each of the Mortality Plus communities. Children will be selected from the current study census. The swabbing visits will occur after the census but **before** treatment. The randomized registration list of children will be provided to the site study coordinator before the swabbing visit. The Study Coordinator will give this list to the community for mobilization prior to examinations.

**9.1 9.2 Nasopharyngeal Swabs**

Nasopharyngeal swabs will be stored in DNA/RNA shield media by Zymo and STGG media, and standard microbiologic techniques will be used to isolate *S. pneumoniae* and test for resistance to azithromycin, penicillin, and clindamycin. Resistant isolates will be assessed for the most common genetic resistant determinants (*ermB* and *mefA*) using a PCR-based assay.<sup>41</sup> Serotype will be assessed using a nested PCR reaction for the most common serotypes, followed by the Quellung reaction for any untyped isolates.<sup>42</sup>

The examiner will:

1. Place a pediatric flocked swab with a nylon tip through the right nostril and down the nasopharynx of each participant. Note that if the swab is not perpendicular to the frontal plane of the face, it is likely not in the inferior turbinate.
2. Once you reach the nasopharynx, rotate the swab 180° as you remove the swab from the nose.
3. Place the swab in a tube containing 1.0 mL DNA/RNA shield media by Zymo or STGG (skim milk, tryptone, glucose, and glycerin) media, cut the handle off using sterile scissors, and close the cap of the tube with the swab immersed.
4. The nasopharyngeal swab samples in STGG will initially be stored in the field at 4°C using an insulated storage bag with Fisher brand ice gel

1044 packs, and then transferred to -20°C. The nasopharyngeal swab  
1045 samples in DNA/RNA shield media will be stored in ambient  
1046 temperature in the field. Then transferred to a refrigerator or freezer.  
1047 5. The scissors used to cut calcium alginate swabs will be sterilized with  
1048 alcohol pads or cleaned with bleach wipes between participants. When  
1049 collecting specimens in DNA/RNA shield, scissors will be cleaned  
1050 between participants - first with bleach wipes, and then with alcohol  
1051 pads.

1052  
1053 Do not attempt to collect the NP swab if you are not successful after **three** attempts.

## 1054 **9.2.1 Materials for Swab Collection for Resistance Testing**

1055

### 1056 **Swabs**

1057 NP specimens will be collected using sterile, individually-wrapped pediatric  
1058 flocked swabs with a plastic swab shaft (manufactured by Copan).

1059

### 1060 **Sample Tubes**

1061 All field samples for DNA testing will be collected into sterile 2.0ml  
1062 microcentrifuge tubes, manufactured by Sarstedt®. (DNA-free tubes will be used  
1063 for collection in DNA/RNA shield.)

1064

### 1065 **Cooler Bags with Frozen Ice Packs**

1066 Insulated cooler bags will be used to carry samples to and from the field. In  
1067 addition, frozen gel ice packs designed to thaw slowly will be used to maintain  
1068 the temperature in the cooler bags during transport.

1069

### 1070 **-20°C Freezer**

1071 A standard -20°C freezer located at the CRSN laboratory will be used strictly for  
1072 the storage and freezing of ice packs and samples. This freezer is kept in a locked  
1073 room on the grounds of the CRSN Laboratory, which is under 24-hour security  
1074 guard supervision.

1075

### 1076 **-80°C Freezer**

1077 A dedicated -80°C freezer located at the CRSN laboratory will be available for  
1078 storage of study samples, including rectal and nasopharyngeal swabs.

1079

## 1080 **9.2.2 Protocol for Tubing and Handling of Samples**

1081 The tubing and handling protocol must be carefully followed in order to prevent  
1082 contamination and ensure the safe transport of the samples back to the CRSN  
1083 laboratory and/or to the US for processing. The person in charge of labeling,

1084 tubing, arranging, and handling the samples needs to perform this task in the  
1085 most orderly and attentive manner.

1086

- 1087 1. Both hands of the tuber should be gloved at all times. The tuber's gloves  
1088 only need to be changed when any potential contamination of the gloves  
1089 occurs. The tuber opens the capped, hinged lid of a microcentrifuge tube,  
1090 which has been labeled with the participant's random identification  
1091 number.
- 1092 2. The swab is inserted by the examiner into the microcentrifuge tube held  
1093 by the tuber. The swab shaft should only be inserted until the swab head  
1094 is fully in the tube. The tuber will cut the swab shaft with sterile scissors.
- 1095 3. The tuber should screw the cap of the microcentrifuge tube tightly, flick  
1096 the tube to mix the sample with the media (for tubes with DNA/RNA  
1097 shield media), and place it in the sample collection box, located in the  
1098 cooler bag filled with frozen ice packs. The flap of the cooler bag should  
1099 be closed between each patient. The cooler bag should be in as cool a  
1100 place as possible in the field, in a shaded area out of the sun.

1101 Upon returning from the field each day, the samples in STGG will be  
1102 immediately taken to the CRSN laboratory and stored in a commercial -20°C  
1103 freezer, reserved solely for storage of specimens and ice packs. All samples will  
1104 be in sample boxes, labeled with the village name for easy future identification.

1105

### 1106 **9.3 Stool Samples**

1107 All study sites will collect either stool samples or rectal swabs for resistance  
1108 testing, but methodology will depend upon the type of samples collected and  
1109 consist of either culturing/microbiological testing or nucleic acid based testing.

1110

#### 1111 **Rectal Swabs for Culturing/Microbiological Testing**

1112 Rectal swabs will be collected and placed into Amies transport media or Norgen  
1113 Stool Preservative. We will use standard microbiologic techniques to isolate  
1114 *Escherichia coli*. Resistance to azithromycin, ampicillin, and co-trimoxazole will be  
1115 determined. Isolates can be further classified into commensal and diarrheagenic  
1116 subtypes using a multiplex PCR assay.<sup>11</sup>

1117

#### 1118 **Stool Samples for Nucleic Acid Based Testing**

1119 Stool specimens will be used to look for the presence of *E. coli* and macrolide  
1120 resistant determinants typically associated with resistant strains of *E. coli*, using  
1121 a resistome approach. This will be carried out by isolating DNA from stool  
1122 specimens and detecting the presence of *E. coli* as well as genes associated with  
1123 antibiotic resistance (i.e. *erm*, *mef*, and *mph* genes) via PCR assays. Other possible  
1124 experiments may eventually include using PCR to detect the presence of toxins  
1125 or virulence factors (i.e. *eae*, *stx*, *bfp-A*, *VT-1*, *VT-2*), which are linked to

1126 diarrheagenic E. coli strains, and exploring the complete microbiome of the stool  
1127 specimens using DNA and RNA sequencing.

1128

### 1129 **9.3.1 Stool Specimen Collection**

1130

#### 1131 **Rectal Swab Collection for Culturing/Microbiological Testing**

1132 The test will require that the child's parent and examiners work together to  
1133 obtain a good sample. Is it important to describe the test to the parent so that  
1134 they can best assist with keeping the child still during the procedure, if  
1135 necessary.

1136

1137 In place of stool specimens, rectal swabs can be collected in the following way:

1138

1. Put on a clean pair of gloves.

1139

2. Partially open the fecal swab package and remove the top section of the  
1140 collection vial (this can be discarded).

1140

1141

3. Position the child:

1142

- Lie the child on his/her back, hold legs in the air (it is useful to  
1143 have assistance).

1143

1144

- Or have the child lay on his/her stomach across the  
1145 mother/guardian's lap

1145

1146

4. Remove the swab from the package. Take care that the cotton tip is not  
1147 touched. If it is touched, throw the swab away and begin with a new one.

1147

1148

5. Insert the tip of the swab into the child's anus only as far as needed to  
1149 contact fecal material (1-3cm) and rotate 180 degrees. The tip should be a  
1150 brownish color when removed.

1149

1150

1151

6. Place swab into the preservative in the collection tube. Make sure the  
1152 swab is fully submerged in the liquid preservative and then break the  
1153 swab off using the pre-scored breaking point.

1152

1153

1154

7. Screw the cap back on the tube and make sure that it's tightened. Wrap  
1155 the area where the cap meets the tube with Parafilm to ensure that the  
1156 sample will not leak, and then place the tube into the appropriate sample  
1157 box.

1155

1156

1157

1158

- If the swab cannot be broken off while the tip is fully submerged in  
1159 the liquid, try twirling the swab in the liquid first (to release the  
1160 contents of the sample into the preservative) before breaking it off.  
1161 Avoid rubbing the sample on the tip of the swab off on the side of  
1162 the tube where there is no liquid.

1159

1160

1161

1162

1163

8. Place a random number label on the collection tube.

1164

1165

10. **Swab storage for Genetic analysis:** Store samples at room temperature.

1166

According to the manufacturer, the preservative in the tube will preserve

1167 DNA for 5 months at room temperature (7 days for RNA), and thereafter  
1168 can be frozen (-20°C or -80°C) for long-term storage.

1169

### 1170 **Stool Specimen Collection for Nucleic Acid Based Testing**

1171 For the study participant/parent of the child:

- 1172 1. Collect the initial stool specimen on a piece of plastic.
- 1173 2. Transfer a few heaping spoonfuls of the fresh stool into the smaller, 4 oz  
1174 disposable plastic container that has a locking lid, using the spoon  
1175 provided. Return this to the trained field worker.

1176

1177 For the trained field worker:

- 1178 1. Wearing fresh gloves, carefully place a portion of the stool sample from  
1179 the disposable 4 oz plastic container into a labeled Norgen Stool Nucleic  
1180 Acid Collection and Transport Tube (15 ml collection tube that contains  
1181 preservative), using the small spatula that is attached to the tube's cap. Fill  
1182 up to the line as indicated by the tube.<sup>44</sup> Make sure to spoon the stool into  
1183 the tube without touching the rim or outside of the tube to avoid any  
1184 contamination.
- 1185 2. Once the stool sample has been added, place the cap tightly back onto the  
1186 tube.
- 1187 3. Mix gently until the stool is well submerged under the preservative. Do  
1188 not shake the tube up and down, just gently swirl.
- 1189 4. Wrap the lid of the tube with a piece of Parafilm to seal it.
- 1190 5. Place the tube into the storage box and store at room temperature.
- 1191 6. Once the final stool sample has been collected in the Norgen Stool Nucleic  
1192 Acid Collection and Transport Tube, wrap up the initial stool sample in  
1193 the large receptacle container using the plastic lining and properly dispose  
1194 of it. Also, dispose of the stool sample in the 4 oz plastic container and the  
1195 spoon that was used.

1196

### 1197 **9.3.2 Materials for Stool Specimen Collection**

1198

#### 1199 **Rectal Swab Collection for Culturing/Microbiological Testing**

##### 1200 **Swab**

1201 An individually-wrapped Copan flocced swab with a plastic shaft will be used  
1202 to collect the rectal swab and then placed into a Stool Nucleic Acid Collection  
1203 and Transport Tube containing Norgen Stool Preservative or Amies Transport  
1204 Medium.

1205

##### 1206 **Sample Tube with Media**

1207 The specimen will be in a sterile Stool Nucleic Acid Collection and Transport  
1208 Tube containing Norgen Stool Preservative or Amies Transport Medium with a  
1209 cap that will be tightened firmly.

1210

### 1211 **Stool Specimen Collection for Nucleic Acid Based Testing**

#### 1212 **Plastic Lining**

1213 Each participant will be given a piece of plastic that will be placed on the ground  
1214 to collect the initial stool sample.

1215

#### 1216 **Spoon**

1217 Wooden medical spoon used to transfer a portion of the initial stool specimen to  
1218 the small plastic container, which will be brought to the trained field worker by  
1219 the parent.

1220

#### 1221 **Small Plastic Container**

1222 4 oz disposable plastic container with locking lid used to transport a portion of  
1223 the initial stool specimen to the trained field worker.

1224

### 1225 **9.1.1 9.3.3 Protocol for Fresh Frozen Stool Collection**

#### 1226 **Materials**

- 1227 • Stool specimen (10-20 grams or ml)
- 1228 • Pre-printed PID labels (4 plus 1 extra)
- 1229 • Plastic disposable transfer pipette for liquid stools
- 1230 • Cotton-tipped wooden stick
- 1231 • Wide-mouthed plastic container suitable for collecting stools
- 1232 • Wooden spatula
- 1233 • Frozen ice packs
- 1234 • Cold box
- 1235 • Tube rack
- 1236 • Disposable latex gloves
- 1237 • Disposable diaper
- 1238 • Sealable plastic bags
- 1239 • Plastic spoon
- 1240 • Pen
- 1241 • Stool Field Collection Form (SFC)

#### 1242 **Collection Procedure**

1243 The stool sample is to be collected within a two day window of the scheduled  
1244 time. Even with the best of efforts the field worker fails to collect stool sample  
1245 within 2 days window, field worker may visit the home up to 5 days beyond that  
1246 +2 time frame.

1247 For collection of Stool, inform child's/participant's primary caretaker/  
1248 participant one day before planned stool collection and request caretaker to  
1249 collect the first available fresh stool sample from the child on the morning of the  
1250 planned visit.

1251 The mother / participant's primary caretaker/ participant should be provided  
1252 with the labeled stool container, diaper (for infants), cold box, ice packs, gloves,  
1253 plastic spoon, and 2 plastic bags the evening before planned stool collection.  
1254 There should be enough ice packs in the cold box to keep it cold for up to 8  
1255 hours.

1256 Instruct the caretaker/ participant to use the plastic spoon to collect 3-4 spoons of  
1257 stool within 20 minutes of defecation and place it in the stool container, close the  
1258 lid tightly, and place the container in the plastic bag.

### 1259 **Temporary Storage and Transport Procedures**

1260  
1261 Instruct the caretaker to place the plastic bag with the stool in the cold box  
1262 immediately after collection (maximum time: 20 minutes). Collect the stool  
1263 specimen as soon as possible and document if the sample was in a cold  
1264 environment on the requisition CRF. Also document if specimen is acceptable  
1265 (estimated quantity, lid closed, and no leakage)

### 1266 **Processing**

1267 Label the original stool container with SID labels. Write the date of collection  
1268 (DD/MM/YY) and time of collection (hh:mm; 24 hour time scale) on the label.

1269

### 1270 **Collection and Transport Procedures for Microbiome analysis**

1271 Initial collection of fecal samples should be made in a suitable sterile container  
1272 after which smaller aliquots of fecal material should be transferred by the field  
1273 worker (*within 20 minutes of defecation*) into pre-labeled, sterile 2ml cryo-safe  
1274 tubes. Tube labels should minimally include the Participant's Sample ID (SID)  
1275 and the date of collection, or as specified by the BEED manual of procedures.

1276 Wearing clean, disposable latex gloves, fill each 2 ml cryo-vial approximately  
1277 one-half to two-thirds full using a sterile spatula and cap tightly. Do not add any  
1278 buffers, preservatives or additives to the sample. [Note that use of screw cap  
1279 vials and not overfilling them minimizes the potential for cross-contamination of  
1280 samples during transport and storage].

1281 Immediately place capped vials into liquid nitrogen pre-charged 'dry shippers'  
1282 (for transport back to the laboratory. Specimens should be transferred to dry  
1283 shippers within 20 minutes of defecation. [Note: dry shippers can be reused  
1284 between charges so long as they are checked each morning following the



1285 manufacturer’s instructions to ensure sufficient liquid nitrogen is present to  
1286 complete the intended sampling needs for the day].  
1287 Upon return to the laboratory, empty the vials from the dry shipper into a bucket  
1288 of dry ice to prevent thawing while sorting and transferring the vials to 9x9  
1289 freezer boxes for longer term storage and transport.

1290

## 1291 **9.4 Quality Control Measures for Specimen Collection**

1292

### 1293 **Negative Field Controls**

1294 Negative field control swabs for NP and stool will be taken in each community to  
1295 assess for contamination: one control swab each (NP and stool/rectal) are taken  
1296 before specimen collection begins in a community; and another (NP and  
1297 stool/rectal) upon completion of specimen collection.

1298 1. For each negative field control, the examiner will open a new swab as  
1299 described above.

1300 2. Wave the swab in the air, without making contact with anyone/anything.

1301 3. Tube the swab in media, as described above.

1302

### 1303 **Duplicate swabs**

1304 Duplicate NP swabs and rectal swabs/stool specimen will be collected from two  
1305 children per community.

1306

1307

## 1308 **10 Chapter 10: Training**

1309

### 1310 **10.1 Standardization**

1311 The research team will work together prior to the baseline visit to standardize all  
1312 study procedures. We will review the format, general logistics, and procedures for  
1313 the house-to-house census. The importance of capturing the vital status of every  
1314 individual in the study area, including individuals not on the previous census (i.e.,  
1315 new births, deaths and migrations) will be stressed. The importance of capturing  
1316 those individuals who were born and died in the time period between two censuses  
1317 will also be highlighted. Census workers who have successfully completed the  
1318 training will be certified, although certification can be revoked on subsequent quality  
1319 control checks. Ongoing training activities (before each biannual census) should  
1320 consist of didactic classroom instruction and mock census activities, followed by in-  
1321 field training, reviewing the use of the electronic data capture, including charging  
1322 devices and troubleshooting technical problems.

1323

## 1324 **Chapter 11: Sample Organization, Transport, and Storage**

1325

1326 **11.1 De-identification**

1327 All specimens will be labeled in the field with a random identification number  
1328 linked to the census in the electronic data capture system, but to facilitate  
1329 masking, only the CRSN DCC will have access to the key linking the ID with  
1330 census information. Age, gender, and community of residence will be available  
1331 for each specimen, but names will be kept confidential. Therefore, all specimens  
1332 will be de-identified.

1333

1334 **11.2 Specimen Transport**

1335 After sample collection, samples from the field will be transported to the CRSN  
1336 laboratory for storage and processing.

1337

1338 During any international specimen transport, the temperature of the shipper  
1339 boxes will be documented by a temperature recording device.

1340

1341 **Blood Samples**

1342 Blood smears (thin and thick) will be transported at room temperature to the  
1343 CRSN laboratory. FTA Elute cards will be transported at room temperature and  
1344 stored at the health clinic before being transported for processing. TropBio cards  
1345 will be transferred on ice to the health center and stored at -20°C prior to  
1346 shipment.

1347

1348 **Swabs**

1349 Swabs in STGG media will be initially stored in the field at -4°C using a closed,  
1350 insulated container until arrival at a securely locked freezer at -20°C. Swabs in  
1351 DNA/RNA Shield media will be stored in ambient temperature in the field and  
1352 then transferred to a refrigerator or freezer.

1353

1354 **Stool Samples**

1355 **Rectal Swabs for Culturing/Microbiological Testing**

1356 Rectal swabs preserved in Amies transport medium should be refrigerated until  
1357 processed. If specimens will be kept more than 2 to 3 days before being cultured,  
1358 it is preferable to freeze them immediately at -80°C. It may be possible to recover  
1359 pathogens from refrigerated specimens up to 7 days after collection; however,  
1360 the yield decreases after the first 1 or 2 days. Frozen specimens should be  
1361 transported on dry ice.

1362

1363 **Stool Samples for Nucleic Acid Based Testing**

1364 Specimens preserved in Norgen Stool Nucleic Acid Collection and Transport  
1365 Tubes can be left at room temperature for 7 days (if preserving RNA) or up to 5  
1366 months (if preserving DNA). Specimens can also be transported in the

1367 preservative at room temperature. If the samples will be kept for long term  
1368 storage, they can be placed in a -20°C or -80°C freezer.

1369

### 1370 **11.3 Specimen Storage**

1371 Sample storage will occur in two stages: short-term and long-term.

1372

#### 1373 **11.3.1 Short-term Sample Storage**

1374 Samples will be labeled with study ID only and are unidentifiable without access  
1375 to the study database. All samples will be transported to the CRSN laboratory for  
1376 storage and processing. A subset of samples will be shipped to UCSF to process  
1377 core samples and any secondary processing.

1378

#### 1379 **11.3.2 Long-term Sample Storage**

1380 All samples processed by the CRSN laboratory will be stored in the -80°C freezer  
1381 for at least 5 years. A subset of de-identified samples from Burkina Faso will be  
1382 shipped to UCSF for longer-term storage at the UCSF Oyster Point Facility,  
1383 which is designed particularly for secure long-term (5 years) storage of biological  
1384 specimens, at -80°C for future analyses by CRSN and UCSF investigators and  
1385 other interested parties.

1386

### 1387 **11.4 Catalog Specimens**

1388 We will create a list of study data and specimens, including the age, gender,  
1389 village identification number, treatment assignment, whether treatment was  
1390 received, vaccination record, and symptom questionnaire. We will also list the  
1391 date of collection and transport, and the storage conditions while in the field and  
1392 while banked at UCSF. This will facilitate identification of specimens for future  
1393 analyses.

1394

## 1395 **11 Chapter 12: Study Medication**

1396 Children aged 1-59 months on the current census will be offered weight- or  
1397 height-based, directly observed, oral suspension (azithromycin or placebo) every  
1398 6 months for 3 years (as performed in trachoma programs) at each study site. At  
1399 the final phase of CHAT, all children 1-59 months will be offered azithromycin.

1400 Children under the age of 12 months or not able to stand will be weighted. In  
1401 addition to being at least 1 month of age, children should weigh at least 3.8 kg to  
1402 be eligible for treatment. This ensures that mistakenly aged or premature infants  
1403 won't be treated. These infants will be eligible for treatment at the subsequent  
1404 distribution, approximately 6 months later. The mortality application will not  
1405 provide a dose for children weighing <3.8 kg.

1406

1407 We will monitor adverse events following mass treatments as described in the  
1408 adverse events section. The treatment and monitoring schedule for all study  
1409 arms is shown in Table 1.

1410

### 1411 **11.1 12.1 Study Medication Description (from Pfizer, Inc.)**

1412

#### 1413 **Azithromycin**

1414 Zithromax® for oral suspension is supplied in bottles containing azithromycin  
1415 dehydrate powder equivalent to 1200mg per bottle and the following inactive  
1416 ingredients: sucrose; tribasic anhydrous sodium phosphate; hydroxypropyl  
1417 cellulose; xanthan gum; FD&C Red #40; and flavoring including spray dried  
1418 artificial cherry, crème de vanilla, and banana. After constitution, a 5mL  
1419 suspension contains 200mg of azithromycin.

1420

### 1421 **12.2 Dosage Information**

1422 Azithromycin and placebo will be administered as a single dose, in oral  
1423 suspension form for children. Dosing will follow the WHO recommendations for  
1424 treatment of active trachoma:

- 1425 • Single dose of 20mg/kg in children (up to the maximum adult dose of  
1426 1g)
- 1427 • Height-based dosing of children ( this dosing method is supported by  
1428 the WHO)

1429

1430 Individuals who are allergic to macrolides/azalides will not be treated.

1431

### 1432 **12.3 Medication Procurement/Donation**

1433 Azithromycin (Zithromax®) and the placebo have been donated by the Pfizer  
1434 Corporation. There will be no costs to acquiring the study medication. Pfizer,  
1435 Inc. will ship azithromycin and placebo directly to the study sites.  
1436 Representatives of the study site will manage the customs process and transport  
1437 the medication from the port to storage sites.

1438

### 1439 **12.4 Medication Quality Control**

1440 Study medication will be shipped directly from Pfizer and stored at CRSN prior  
1441 to use. The study coordinator and other staff will regularly check and record the  
1442 study medication expiration dates. We will strictly monitor expiration dates on  
1443 the medication containers and all expired study medicine will be discarded  
1444 appropriately.

1445

### 1446 **12.5 Antibiotic Distribution & Monitoring Coverage**

1447 After the MORDOR 0 census and monitoring/collection is complete, treatment  
1448 (azithromycin and placebo) will be administered to all eligible community

1449 members per study protocol. Teams will participate in training exercises  
1450 regarding drug/placebo distribution and recording techniques prior to each  
1451 treatment cycle. Training will be in accordance with the Zithromax Program  
1452 Manager’s Guide from the International Trachoma Initiative.  
1453  
1454 During mass drug administration, distribution team members will use tablet  
1455 computers equipped with an electronic data capture system to seek out each  
1456 eligible child on the census, administer antibiotic or placebo, and record whether  
1457 or not each person has been treated. The distribution team will document  
1458 individual reasons for not being treated (e.g. death, temporary absence,  
1459 permanent migration, refusal of treatment, etc.). Consumption of medication will  
1460 be directly observed and the dose distributed will be documented in the  
1461 electronic data capture system.  
1462  
1463 We will estimate antibiotic coverage from the most recent biannual census  
1464 records, aiming for treatment of 80% of children. At the end of each treatment  
1465 round, the DCC will identify any children who have missed 2 or more  
1466 consecutive treatments, and relay this information to the study coordinator.  
1467 Census teams will discern the reason for missing treatments (including  
1468 unrecorded death) at the next scheduled census. This system will serve as a  
1469 quality control mechanism to reduce the number of false negative deaths in the  
1470 study.  
1471  
1472 **12.6 Adverse Reactions/Side Effects**  
1473 Azithromycin is generally well-tolerated. The most common side effects of  
1474 azithromycin are diarrhea, nausea, abdominal pain, and vomiting, each of which  
1475 may occur in fewer than one in twenty persons who receive azithromycin. Rarer  
1476 side effects include abnormal liver function tests, allergic reactions, and  
1477 nervousness. Diarrhea due to *Clostridium difficile* has been reported in rare cases.  
1478  
1479 During the consent process, the common adverse reactions that may occur will  
1480 be explained to parents/guardians and they will be advised to communicate  
1481 adverse events to CRSN study staff immediately. If, for any reason, the  
1482 participant needs further care, they will be referred to the nearest health center  
1483 for examination and treatment.  
1484  
1485 The trial sites will be masked to outcomes, so the responsibility for monitoring  
1486 interim analysis will fall on the DSMC. Statistical monitoring is discussed in the  
1487 Statistical Analysis Plan. The Data Safety and Monitoring Committee (DSMC)  
1488 will be given authority to discontinue treatments at any time if there is evidence  
1489 of unexpected harm.  
1490

1491 **12.7 Adverse Events Systems**

1492 Both active and passive monitoring systems for adverse events are in place for  
1493 this study, and these monitoring activities will specifically include (but will not  
1494 be limited to) treated 1-6 month olds. We will monitor adverse events following  
1495 mass treatments actively at each follow-up census and during a house-to-house  
1496 survey of all 1-6 month olds in a random selection of azithromycin and control  
1497 communities.

1498

1499 **12.7.1 Passive Adverse Events Monitoring**

1500 We will implement a passive monitoring system during the treatment phase, by  
1501 instructing parents to report any adverse events in the two weeks following each  
1502 mass azithromycin distribution to a local healthcare provider. Children will be  
1503 referred for follow up care on a case-by-case basis.

1504

1505 **12.7.2 Active Adverse Events Monitoring**

1506

1507

1508

1509 **Infant Adverse Events Survey**

1510 To identify any adverse events associated with mass treatment, the research team  
1511 will randomly select 48 study communities (12 per arm) to participate in an  
1512 adverse events survey. This survey will be performed by the census workers  
1513 masked to treatment arm, approximately 2 weeks after a mass medication  
1514 distribution during the first phase only (CHAT 0). During the survey, adverse  
1515 events will be elicited only for study participants aged 1-6 months at the  
1516 previous census. A structured questionnaire will be performed to elicit  
1517 dangerous side effects, followed by an open-ended question. Specifically, we will  
1518 ask the primary caregiver about the following symptoms during the time since  
1519 the previous antibiotic distribution: abdominal pain, vomiting, diarrhea,  
1520 constipation, hemorrhoids or rash. We will only collect this infant adverse events  
1521 survey for the first phase. The rest of the phases of the trial will not collect this  
1522 information.

1523

1524 **Training**

1525 The household survey team will be the same individuals who conducted the  
1526 census. They will be trained in survey administration methods, including:

- 1527 1. Obtaining informed consent  
1528 2. Accurately selecting the appropriate households to interview  
1529 3. Remaining neutral when asking questions (i.e. asking the question  
1530 exactly as it is written on the paper in a neutral tone of voice, so as not  
1531 to lead the respondent or introduce bias)

1532

1533 **Serious Adverse Events**

1534 Any serious adverse events (SAE) will be reported to Pfizer. An **IIR SAE Form**  
1535 (*Investigator-Initiated Research Serious Adverse Events Form*) will be completed for  
1536 each event. (See Appendix for form and complete instructions.)

1537

1538 According to Pfizer, an SAE is any adverse event that:

- 1539 • Results in death  
1540 • Is life-threatening (i.e., causes an immediate risk of death)  
1541 • Requires inpatient hospitalization or prolongation of existing  
1542 hospitalization  
1543 • Results in persistent or significant disability or incapacity  
1544 • Results in a congenital anomaly or birth defect

1545

1546 Or that is considered to be:

1547

- 1548 • An important medical event

1549

1550 All community residents will be advised to alert a village health worker if they  
1551 experience, within one week of mass treatment, a serious adverse event (by the  
1552 preceding definition). An SAE report must be submitted for all deaths in the  
1553 study - regardless of the time of treatment. The local health worker will report to  
1554 the study coordinator; who must, within 24 hours, submit a Pfizer **IIR SAE Form**  
1555 to [mordor.burkina.sae@gmail.com](mailto:mordor.burkina.sae@gmail.com). AS and TL will review, and forward to Pfizer  
1556 and/or the Medical Monitor, as appropriate. SAEs must be submitted to Pfizer  
1557 within 24 hours of receipt from the on-site coordinator. AS and TL will also  
1558 forward SAE to DSMC if meets criteria of being possibly related to study drug.  
1559 The reporting of any serious adverse event will follow national procedures in  
1560 Burkina Faso.

- 1561 • In the event of serious events, the CSPS will contact the study doctors  
1562 on the same day. The patient will then be evacuated to an appropriate  
1563 level of care for management.
- 1564 • The declaration will be made to the National Agency for  
1565 Pharmaceutical Regulation in accordance with the regulations and  
1566 within the deadlines (7 days in the event of death or life-threatening  
1567 prognosis, 15 days in other serious and unexpected cases, 15 days in  
1568 new facts) at [pharmacovigilance.burkina@sante.gov.bf](mailto:pharmacovigilance.burkina@sante.gov.bf)
- 1569 • The ethics committees will also be informed of the occurrence of this  
1570 event within the same time frame.

1571  
1572 Deaths that are reported to the study team outside of the biannual census  
1573 (primary outcome) will be reported as an SAE to Pfizer. Note that deaths  
1574 identified via the biannual census, which constitute the primary outcome, will  
1575 not be reported as SAEs. Deaths that are reported to the study team as part of the  
1576 biannual census will be reported to Pfizer in aggregate, not by arm, on a  
1577 quarterly basis.

1578  
1579

### 1580 **12.7.3 Adverse Events Data**

1581 We will keep records and report all adverse events of azithromycin to the DSMC.  
1582 We will report both efficacy and side effects of azithromycin separately for the 1-  
1583 6 month old age group. For any “sudden deaths” believed to be associated with  
1584 azithromycin treatment, key informants will immediately notify the verbal  
1585 autopsy interviewer via SMS message or another appropriate form of rapid  
1586 communication. Reporting of non-serious adverse events will follow national  
1587 procedures in Burkina Faso, as well. In the event of a non-serious adverse event,  
1588 the CSPS will process the cases and the national reporting form will be  
1589 completed. Any adverse event occurring during the trial will be covered by the  
1590 study free of charge.

1591



1592 **11.2 12.8 Supply issues**

1593 If a study site runs out of a treatment letter, a request should be sent to  
1594 [mordor.burkina.tx@gmail.com](mailto:mordor.burkina.tx@gmail.com) to request a replacement for the community in  
1595 question. This is not blanket permission to substitute one letter for another – if  
1596 there are several communities for which the assigned treatment has run out, a  
1597 separate request must be made for each community.

1598  
1599 The study site coordinator will make the request; TCP will determine the  
1600 replacement letter, a member of the DCC will make the change(s) in the  
1601 database.

1602  
1603 The field team must log out of the MORDOR mobile app and log in again for the  
1604 changes to take effect on the front end. The replacement treatment letter will then  
1605 appear in the app.

1606

1607 **12 Chapter 13: Protection of Human Subjects**

1608 Before the study begins, the research team will obtain formal ethical approval  
1609 from their respective ethics committees as well as national ethical approval in  
1610 Burkina Faso. In addition, staff will approach community leaders to describe the  
1611 study and answer any questions. Study staff will proceed only if local leadership  
1612 consents to participate. Verbal consent will be collected from the village  
1613 leadership. We will also obtain verbal consent from the head of household to be  
1614 able to perform the census. To be able to examine and treat the children living in  
1615 the household, we will obtain written informed consent from a parent or  
1616 guardian. This written consent will contain information regarding all study  
1617 activities with patient contact: examinations, and treatments. We will collect one  
1618 written consent form per child the first time we enroll the child. The subsequent  
1619 visits we will explain the study to the parent/guardian of the child but we will  
1620 only obtain verbal consent. Children will be included in the study only following  
1621 the receipt of the written consent from a parent or guardian. If, at any time, a  
1622 parent or guardian elects to withdraw a family member from the study, they will  
1623 be free to do so. Individuals who withdraw will be offered the same medical  
1624 treatment outside the study.

1625

1626 Children with wasting, stunting, malaria, or anemia will be referred for  
1627 appropriate treatment by trained study personnel, at the nearest health center.

1628

1629 **13.1 Institutional Review Board Approval**

1630

1631 **UCSF Committee on Human Research**

1632 UCSF's Committee on Human Research will annually review study protocol for  
1633 ethical approval.

1634

1635 **CRSN Comité Institutionnel d'Ethique**

1636 The study protocol will be reviewed and granted ethical approval by the Comité  
1637 Institutionnel d'Ethique at the CRSN headquarters before any patient-related  
1638 research activities begin.

1639

1640 **National Health Ethics Committee of Burkina Faso.**

1641 The study protocol will be reviewed and granted ethical approval by the  
1642 National Health Ethics Committee of Burkina Faso before any patient-related  
1643 research activities begin and annually.

1644

1645 **13.2 Informed Consent**

1646 First, the chairman of each village will be asked for permission to include the  
1647 village in the study. Additionally, the study will be discussed with all adults in  
1648 the village by team members who speak the local language(s).

1649  
1650 Informed consent scripts will be translated into local languages before the study  
1651 can begin. Consent scripts will then be back-translated by a different party to  
1652 ensure comprehension. Consent scripts will be submitted and approved by  
1653 national IRB committees in Burkina Faso prior to study implementation. Then  
1654 they will be read aloud to each study participant (and his/her parent/guardian)  
1655 by a team member who is a native speaker of the local language to ensure that  
1656 they understand the risks and benefits of participating in all study activities.  
1657 Young adults and children under 18 years of age, who cannot give consent by  
1658 law, will be included in the study only following the receipt of written informed  
1659 consent from a parent or guardian. If, at any time, a parent or guardian elects to  
1660 withdraw themselves or a family member from the study, it will be made clear  
1661 that they will still be eligible for treatment.

1662

1663 **13.3 Risks and Benefits of Study Procedures**

1664

1665 **13.3.1 Verbal Autopsy**

1666 As verbal autopsy requires a family member to answer questions about a  
1667 deceased loved one, he or she might experience emotional stress and grief related  
1668 to the death of the child. Interviewers will be trained to address these situations  
1669 appropriately with awareness of the cultural context before they are allowed to  
1670 conduct these verbal autopsies. If the family member is in need of a mental  
1671 health intervention, referrals will be made by the interviewer.

1672

1673 **13.3.2 Swabbing Procedures**

1674 There are minimal risks to the participant who receives nasopharyngeal, and  
1675 nares swabbing. Participants may experience some temporary discomfort, but  
1676 the swabbing involves minimal risk. Any adverse effects, such as nose-bleeds,  
1677 will be treated immediately by the examiners. Other health care will be provided  
1678 at no cost to the study participant if necessary to address a study-related adverse  
1679 health event.

1680

1681 **13.3.3 Stool Collection**

1682 Stool samples have been collected in this setting before, with essentially no risk  
1683 to participants.

1684

1685 **13.3.4 Blood Testing**  
1686 Blood testing will include a pin prick to the finger or heel. The major risk of this  
1687 procedure is infection at the puncture site, though using aseptic technique will  
1688 minimize this occurrence. Individuals in these communities are familiar with this  
1689 procedure because all children who present at a health center with fever are  
1690 offered the pinprick for a malaria thick smear.

1691  
1692 **13.3.5 Anthropometric Measurements**  
1693 There are minimal risks associated with the measuring board, scale, or MUAC  
1694 tapes aside from anxiety during the measurements. Examiners will do their best  
1695 to ensure that the parent/guardian of the child understands the process of  
1696 assessing anthropometric measurements. The examiners will attempt to  
1697 minimize discomfort for all study participants before, during, and after the  
1698 measurements are taken. Children with wasting, stunting, malaria, or anemia  
1699 will be referred for appropriate treatment at the nearest health center.

1700

1701 **13 Chapter 14: Study Monitoring**

1702 The project will be continuously monitored by the supervisory team, which will  
1703 consist of members from CRSN and UCSF. The supervisory team will conduct  
1704 regular monitoring visits to study site locations, with UCSF team members  
1705 accompanying CRSN team members at least biannually.

1706 **14 Chapter 15: Data and Safety Monitoring Committee Charter**

1707 This Charter is for the Data Safety and Monitoring Committee (DSMC) for  
1708 *Mortality Reduction after Oral Azithromycin II Burkina Faso* (MORDOR II Burkina):  
1709 OPP1187628.

1710  
1711 The Charter will define the primary responsibilities of the DSMC, its relationship  
1712 with other trial components, its membership, and the purpose and timing of its  
1713 meetings. The Charter will also provide the procedures for ensuring  
1714 confidentiality and communication, statistical monitoring guidelines to be  
1715 implemented by the DSMC, and an outline of the content of the Open and  
1716 Closed Reports that will be provided to the DSMC.

1717

1718 **15.1 Primary Responsibilities of the DSMC**

1719 The DSMC will be responsible for safeguarding the interests of trial participants,  
1720 assessing the safety and efficacy of the interventions during the trial, and  
1721 monitoring the overall conduct of the trial. The DSMC will provide  
1722 recommendations about stopping or continuing the trial. To contribute to the  
1723 integrity of the trial, the DSMC may also formulate recommendations relating to  
1724 the selection/recruitment/retention of participants, to protocol-specified  
1725 regimens, and the procedures for data management and quality control.

1726

1727 The DSMC will be advisory to the trial leadership group, hereafter referred to as  
1728 the Steering Committee (SC). The SC will be responsible for promptly reviewing  
1729 the DSMC recommendations and determining, whether to continue or terminate  
1730 the trial, and to determine whether amendments to the protocol are required. If  
1731 needed, the DSMC may seek the advice of a content expert outside of the  
1732 committee.

1733

1734  
1735  
1736  
1737  
1738  
1739  
1740  
1741  
1742  
1743  
1744  
1745  
1746  
1747  
1748  
1749  
1750  
1751  
1752  
1753  
1754  
1755  
1756  
1757  
1758  
1759  
1760  
1761  
1762  
1763  
1764  
1765  
1766  
1767  
1768  
1769  
1770  
1771  
1772  
1773  
1774  
1775

**15.2 DSMC Membership**

The DSMC is an independent multidisciplinary group consisting of epidemiologists, biostatisticians, bioethicists, and clinicians that collectively has experience in the management of infectious diseases and in the conduct and monitoring of randomized clinical trials including subsaharan Africa.

**15.3 Conflicts of Interest**

The DSMC membership has been restricted to individuals free of apparent conflicts of interest. The source of these conflicts may be financial, scientific, or regulatory. Thus, neither study investigators nor individuals employed by the sponsor, nor individuals who might have regulatory responsibilities for the trial products, are members of the DSMC.

The DSMC members will disclose to fellow members any consulting agreements or financial interests they have with the sponsor of the trial, with the contract research organizations (CRO) , or with other sponsors having products that are being evaluated or that are competitive with those in the trial. The DSMC will be responsible for deciding whether these consulting agreements or financial interests materially impact their objectivity.

The DSMC members will be responsible for advising fellow members of any changes in any of the membership requirements that occur during the course of the trial. It may be appropriate for DSMC members who develop significant conflicts of interest resign from the DSMC.

DSMC membership is to be for the full duration of the trial. If any members leave the DSMC, the SC, in consultation with the DSMC, will promptly appoint a replacement.

**15.4 Timing and Purpose of the DSMC Meetings**

**Organizational Meeting**

The initial meeting of the DSMC will be an Organizational Meeting. This is during the final stages of protocol development and the purpose is to provide advisory review of scientific and ethical issues relating to study design to discuss the standard operating procedures and to discuss the format and content of the Open and Closed Reports that will be used to present trial results.

The Organizational Meeting will be attended by all DSMC members, lead trial investigators, and the trial biostatistician. The DSMC will be given the drafts of the trial protocol, the Statistical Analysis Plan, the DSMC Charter, and the

1776 current version of the case report forms. At subsequent meetings, committee  
1777 members will receive Open and Closed Data Reports.

1778

### 1779 **Formal Interim Analysis Meetings**

1780 One or more 'Formal Interim Analysis' meetings will be held to review data  
1781 relating to treatment safety and efficacy, and quality of trial conduct. There will  
1782 be at least two interim decisions to be made by the DSMC, at approximately 12  
1783 months and 24 months into the study.

1784

### 1785 **15.5 Procedures to Ensure Confidentiality and Proper Communication**

1786 To enhance the integrity and credibility of the trial, procedures will be  
1787 implemented to ensure the DSMC has access to all emerging information from  
1788 the trial regarding comparative results of efficacy and safety, aggregated by  
1789 treatment arm.

1790

### 1791 **Closed Sessions**

1792 Sessions involving only DSMC members and, where appropriate, those  
1793 unmasked trial investigators (on the Data Coordinating Committee) who  
1794 generate the Closed Reports (called Closed Sessions) will be held to allow  
1795 discussion of confidential data from the trial, including information about the  
1796 relative efficacy and safety of interventions.

1797

1798 At a final Closed Session, the DSMC will develop a consensus on its list of  
1799 recommendations, including that relating to whether the trial should continue.

1800

### 1801 **Open Session**

1802 In order for the DSMC to have access to information provided, by study  
1803 investigators, or members of regulatory authorities, a joint session between these  
1804 individuals and DSMC members will be held between the Closed Sessions.

1805

### 1806 **Open and Closed Reports**

1807 For each DSMC meeting, Open and Closed Reports will be provided. Open  
1808 Reports, will include data on recruitment and baseline characteristics, pooled  
1809 data on eligibility violations, and completeness of follow-up and compliance. The  
1810 study statistician (TCP) will prepare these Open Reports.

1811

1812 Closed reports, available only to those attending the Closed Sessions of the  
1813 meeting, will include analyses of primary and secondary efficacy endpoints,  
1814 including subgroup and adjusted analyses, AEs and symptom severity, , and  
1815 Open Report analyses that are displayed by intervention group. These Closed  
1816 Reports will be prepared by the study biostatistician.

1817

1818 The Open and Closed Reports should provide information that is accurate, with  
1819 follow-up that is complete to within two months of the date of the DSMC  
1820 meeting. The Reports should be provided to DSMC members approximately  
1821 three days prior to the date of the meeting.

1822

### 1823 **Minutes of the DSMC Meeting**

1824 The research team will prepare minutes for the open portion of the meeting,  
1825 including the DSMC's recommendations.

1826

### 1827 **Recommendations to the Steering Committee (SC)**

1828 At each meeting of the DSMC during the trial, the committee will make a  
1829 recommendation to the Steering Committee to continue or terminate. This  
1830 recommendation will be based primarily on safety and efficacy considerations  
1831 and will be guided by statistical monitoring guidelines defined in this Charter.

1832

1833 Recommendations to amend the protocol or conduct of the study made by the  
1834 DSMC will be considered and accepted or rejected by the SC. The SC will be  
1835 responsible for deciding whether to continue or to stop the trial based on the  
1836 DSMC recommendations.

1837

1838 The DSMC will be notified of all changes to the protocol or to study conduct. The  
1839 DSMC concurrence will be sought on all substantive recommendations or  
1840 changes to the protocol or study conduct prior to implementation.

1841

1842 The SC may communicate information in the Open Report to the sponsor and  
1843 may inform them of the DSMC recommended alterations to study conduct or  
1844 early trial termination in instances in which the SC has reached a final decision  
1845 agreeing with the recommendation. The SC will maintain confidentiality of all  
1846 information it receives other than that contained in the Open Reports until after  
1847 the trial is completed or until a decision for early termination has been made.

1848

### 1849 **15.6 Statistical Monitoring Guidelines**

1850 The SC will propose statistical rules for a futility stopping rule (requested by the  
1851 sponsor) and an efficacy stopping rule at the first DSMC meeting. A decision will  
1852 be made whether the efficacy stopping rule is appropriate for the relatively short,  
1853 2-year study.

1854



1855

1856 **15.7 DSMC Contact Information**

1857

1858 **Table 5:** DSMC Contact Information

|                        |                                                                            |
|------------------------|----------------------------------------------------------------------------|
| Allen Hightower, Chair | <a href="mailto:awh1953@gmail.com">awh1953@gmail.com</a>                   |
| Amza Abdou             | <a href="mailto:dr.amzaabdou@gmail.com">dr.amzaabdou@gmail.com</a>         |
| Jackie Glover          | <a href="mailto:Jackie.Glover@ucdenver.edu">Jackie.Glover@ucdenver.edu</a> |
| Wafaie Fawzi           | <a href="mailto:mina@hsph.harvard.edu">mina@hsph.harvard.edu</a>           |
| Miriam Laufer          | <a href="mailto:mlaufer@som.umaryland.edu">mlaufer@som.umaryland.edu</a>   |

1859

1860 **15 Chapter 16: Data Collection, Management, and Security**

1861

1862 **16.1 Scope of Data**

1863 Mortality and morbidity data will be collected in this trial. Mortality data includes:  
1864 census, mortality, and treatment. Morbidity and resistance data includes the  
1865 following: census, mortality, treatment, and morbidity assessments.

1866 **Mortality Data**

1867 Trained census workers will collect census data on all households in the study sites  
1868 (name, birthdate, age, gender of all household members) and keep track of births,  
1869 deaths, and migration of children eligible for treatment. In addition to biannual  
1870 census updates, trained community health workers and study supervisors will  
1871 conduct WHO verbal autopsy interviews through the duration of the study to  
1872 provide information on the cause of death. Trained distribution teams will collect  
1873 data on treatment status and dose given to all study participants, if treatment is  
1874 provided apart from the time of census.

1875

1876 **Mortality-Plus Data**

1877 Trained health workers will collect data on core morbidity assessments such as blood  
1878 samples (thick smears and dried blood spots for malaria, microcuvettes for  
1879 hemoglobin), stool samples, and nasopharyngeal swabs. Note that for de-  
1880 identification purposes a random number sticker will be affixed to each specimen  
1881 collected. In addition, before sample collection, parents or guardians will be asked a  
1882 standardized series of questions to determine whether the child has had recent fever,  
1883 cough, or diarrhea. Clinic-based case finding will be conducted at local health clinics,  
1884 which will involve transcription of health records.

1885

1886 Certain morbidity assessments will be entered into handheld mobile devices at the  
1887 time of the examination (e.g. hemoglobin, responses to symptom questionnaire),  
1888 while lab results for thick smears, dried blood spots, nasal, nasopharyngeal, and stool  
1889 specimens will be entered after confirmation.

1890 **16.2 Data Storage, Management, and Security**

1891 Data will be recorded electronically using handheld mobile devices with custom-  
1892 made software applications and uploaded daily onto a secure, password  
1893 protected, central server. Rapid transfer of electronically captured data will allow  
1894 nearly real-time monitoring of activity at the study site. All handheld devices  
1895 and data entry coordinating centers will be password protected, and all changes  
1896 in data will be noted, including the date of the change, and the person who made  
1897 the change. To ensure the quality of the data, we will conduct training sessions

1898 before each biannual census where needed. The central database application will  
1899 use hard disk encryption and physical protection of the server (which is to be  
1900 maintained in a locked room accessible only to authorized personnel). The  
1901 database will be based on MySQL (which supports standard SQL queries). Data  
1902 will be backed up off site (providing integrity in case of the physical loss of the  
1903 server). Data will never be deleted from mobile capture devices until at least one  
1904 offsite backup has been completed. Data security during electronic transfer will  
1905 be achieved through use of the Advanced Encryption Standard (AES).

1906

### 1907 **16.3 Data Monitoring and Cleaning**

1908 Data monitoring and cleaning will be overseen by the data coordinating center  
1909 (DCC) at the coordinating site. Data collection will be monitored on a weekly  
1910 basis by the site study coordinator using the dashboard function on Survey  
1911 solutions. The survey solution dashboard will consist of the following reports by  
1912 study site: Date Household Census Completed, Number of Households Census  
1913 Completed by Village, Percent Household Census Completed by village,  
1914 Treatment Status by Worker, Age Distribution by Worker, Sex Distribution by  
1915 Worker, GPS Missing by Worker, GPS Missing by Village, Number of Records  
1916 Synced by Date, Assigned Treatment by Given Treatment, Treatment Status by  
1917 Age, Treatment Status by Village, Age Distribution by Village, and Sex  
1918 Distribution by Village.

1919

1920 The DCC will ensure that the site study coordinators log on to Survey solution  
1921 weekly to confirm the status of the dashboard. In addition, upon each village  
1922 census completion, the DCC will create and maintain a Stata program to identify  
1923 data quality concerns. Any such concerns which must be addressed at the site  
1924 specific level will be queried by the DCC. At every phase, as each village is  
1925 completed and the data is considered cleaned, the data will be locked and a list  
1926 of deaths will be generated and provided to each site for verbal autopsy.

1927

1928

1929 **16 Appendix**

1930

1931 Appendix 1. SAP

1932 Appendix 2. Infant Adverse Events survey

1933 Appendix 3. Pfizer Investigator Initiated Research Serious Adverse Event Report

1934 Form and Completion Guide

1935 Appendix 4. Lab Protocol

1936 Appendix 5. Community study forms

1937

1938

1939

1940

1941

1942

1943

1944

1945

1946

1947

1948

1949

1950

1951

1952

1953

1954

1955

1956

1957

1958

1959

1960

1961

1962

1963

1964

1965

1966

1967

1968

1969

1970

1971 **References**

1972

- 1973 1 Porco TC, Gebre T, Ayele B, *et al.* Effect of Mass Distribution of  
1974 Azithromycin for Trachoma Control on Overall Mortality in Ethiopian  
1975 Children: A Randomized Trial. *JAMA* 2009; **302**: 962–8.
- 1976 2 MORDOR Study Group. Mortality Reduction After Oral Azithromycin  
1977 (MORDOR) Study. 2017.
- 1978 3 Sie A, Louis VR, Gbangou A, *et al.* The Health and Demographic  
1979 Surveillance System (HDSS) in Nouna, Burkina Faso, 1993–2007. *Global  
1980 Health Action* 2010; **3**: 1–10.
- 1981 4 Wang H, Bhutta ZA, Coates MM, *et al.* Global, regional, national, and  
1982 selected subnational levels of stillbirths, neonatal, infant, and under-5  
1983 mortality, 1980–2015: a systematic analysis for the Global Burden of Disease  
1984 Study 2015. *The Lancet* 2016; **388**: 1725–74.
- 1985 5 Golding N, Burstein R, Longbottom J, *et al.* Mapping under-5 and neonatal  
1986 mortality in Africa, 2000–15: a baseline analysis for the Sustainable  
1987 Development Goals. *The Lancet* 2017; : 1–12.
- 1988 6 Muller O, Garenne M, Kouyate B, Becher H. The association between  
1989 protein–energy malnutrition, malaria morbidity and all-cause mortality in  
1990 West African children. *Tropical Medicine & International Health* 2003; **8**: 507–  
1991 11.
- 1992 7 Becher H, Muller O, Dambach P, *et al.* Decreasing child mortality, spatial  
1993 clustering and decreasing disparity in North-Western Burkina Faso. *Tropical  
1994 Medicine & International Health* 2016; **21**: 546–55.
- 1995 8 World Health Organization,, UNICEF. WHO/UNICEF Joint Statement:  
1996 Managing possible serious bacterial infection in young infants 0–59 days old  
1997 when referral is not feasible. 2017.
- 1998 9 Yé M, Diboulo E, Niamba L, *et al.* An improved method for physician-  
1999 certified verbal autopsy reduces the rate of discrepancy: experiences in the  
2000 Nouna Health and Demographic Surveillance Site (NHDSS), Burkina Faso.  
2001 *Population Health Metrics* 2011; **9**: 34.
- 2002 10 Byass P, Herbst K, Fottrell E, *et al.* Comparing verbal autopsy cause of death  
2003 findings as determined by physician coding and probabilistic modeling: a  
2004 public health analysis of 54 000 deaths in Africa and Asia. *Journal of Global*

- 2005            *Health* 2015; 5: 1-9.
- 2006    11   Tobias J, Vutukuru S-R. Simple and rapid multiplex PCR for identification of  
2007            the main human diarrheagenic *Escherichia coli*. *Microbiological Research* 2012;  
2008            167: 564-70.
- 2009
