# Supplementary material
Source: PubMed Central journal article supplement (PMC10865159)
Supplement: jama-e2327393-s003.pdf [file jama-e2327393-s003.pdf]

## **Supplementary Appendix**

This appendix has been provided by the authors to give readers additional information about their work.

Supplement to: Oldenburg C, Ouattara M, Bountogo M, et al. Mass azithromycin distribution to prevent child mortality: a randomized trial.

**Table S1.** Treatment coverage during each twice-yearly treatment round. Study treatments were delivered to each study community during each twice yearly (approximately 6 months apart) census and treatment round.

| Treatment Round | Azithromycin  |                 | Placebo       |                 |
|-----------------|---------------|-----------------|---------------|-----------------|
|                 | n/N           | % coverage (SD) | n/N           | % coverage (SD) |
| <b>Overall</b>  | --            | 90.1% (16.0%)   | --            | 89.8% (17.1%)   |
| Month 0         | 22,105/25,067 | 86.4% (20.1%)   | 21,470/25,464 | 84.4% (23.8%)   |
| Month 6         | 21,204/24,453 | 87.0% (17.2%)   | 20,853/24,123 | 86.4% (15.7%)   |
| Month 12        | 21,925/23,354 | 93.3% (9.3%)    | 21,632/21,632 | 94.1% (4.6%)    |
| Month 18        | 22,782/23,731 | 94.5% (14.5%)   | 22,554/23,334 | 96.6% (5.6%)    |
| Month 24        | 20,521/22,512 | 91.1% (12.1%)   | 19,857/22,518 | 88.3% (21.4%)   |
| Month 30        | 18,924/21,155 | 88.6% (18.2%)   | 18,154/20,124 | 89.4% (17.7%)   |

Abbreviations: n: number of treatments distributed; N: number of children in the community; SD, standard deviation

**Table S2.** Children who moved or had an unknown vital status by arm across all study phases. By design, no attempt was made to follow children who moved out of the study community.

| <b>Status</b> | <b>Azithromycin (%)<br/>N = 44286</b> | <b>Placebo (%)<br/>N = 44513</b> | <b>P-value</b> |
|---------------|---------------------------------------|----------------------------------|----------------|
| Moved         | 4785 (10.8%)                          | 4290 (9.6%)                      | 0.48           |
| Unknown       | 111 (0.3%)                            | 104 (0.2%)                       | 0.66           |

**Table S3.** Adjusted estimate of the Incidence Rate Ratio (IRR) for Azithromycin vs Placebo all-cause mortality among children 1-59m. The IRR was estimated using a modified Poisson generalized linear model of child-phase level 6-month risk periods with death as a binary outcome in each period (N=237,434 periods at risk). 95% Confidence Intervals (CI) estimated using robust, sandwich standard errors, clustered at the community level. The model-based P-value for Azithromycin vs. Placebo was 0.06, and the Permutation-based P-value was 0.07 (10,000 permutations).

|                             | IRR   | (95% CI)       |
|-----------------------------|-------|----------------|
| Azithromycin (vs Placebo)   | 0.823 | (0.670, 1.010) |
| Age (months)                | 0.981 | (0.977, 0.984) |
| Female (vs male)            | 0.882 | (0.777, 1.001) |
| Distance to CSPS (km)       | 1.022 | (0.994, 1.051) |
| Cluster size (n children)   | 1.002 | (1.000, 1.003) |
| Month of the year (Jan ref) |       |                |
| Feb                         | 2.109 | (1.411, 3.154) |
| Mar                         | 0.691 | (0.452, 1.059) |
| Apr                         | 1.135 | (0.765, 1.683) |
| May                         | 1.366 | (0.940, 1.986) |
| Jun                         | 0.859 | (0.615, 1.199) |
| Jul                         | 1.103 | (0.805, 1.511) |
| Aug                         | 1.091 | (0.835, 1.425) |
| Sep                         | 0.955 | (0.730, 1.250) |
| Oct                         | 1.002 | (0.791, 1.268) |
| Nov                         | 1.091 | (0.844, 1.412) |
| Dec                         | 1.075 | (0.779, 1.483) |

**Table S4.** Adverse events among infants <6 months of age participating in the first treatment round in the trial in a subset of 48 study clusters. Adverse events were collected via caregiver survey approximately two weeks following distribution of the treatment dose.

| <b>Symptom</b> | <b>Azithromycin</b> | <b>Placebo</b> |
|----------------|---------------------|----------------|
| N interviewed  | 269                 | 199            |
| Diarrhea       | 30 (11.2%)          | 5 (2.5%)       |
| Abdominal pain | 19 (7.1%)           | 6 (3.0%)       |
| Vomiting       | 11 (4.1%)           | 0 (0%)         |
| Constipation   | 10 (3.7%)           | 0 (0%)         |
| Hemorrhoids    | 5 (1.9%)            | 3 (1.5%)       |
| Rash           | 2 (0.7%)            | 0 (0%)         |
