# Supplementary material
Source: PubMed Central journal article supplement (PMC10865159)
Supplement: jama-e2327393-s004.pdf [file jama-e2327393-s004.pdf]

## Data Sharing Statement

### Data

**Data available:** Yes

**Data types:** Deidentified participant data, Data dictionary

**How to access data:** De-identified source data and code for the study are available through the Open Science Framework (<https://osf.io/4eg83/>).

**When available:** With publication

### Supporting Documents

**Document types:** Statistical/analytic code

**How to access documents:** De-identified source data and code for the study are available through the Open Science Framework (<https://osf.io/4eg83/>).

**When available:** With publication

### Additional Information

**Who can access the data:** Data will be available without restriction.

**Types of analyses:** Data will be available without restriction.

**Mechanisms of data availability:** Data will be available without restriction.
